# Supplementary material for: Unrestrained markerless trait stacking in Nannochloropsis gaditana through combined genome editing and marker recycling technologies
Source: PubMed Central journal article supplement — Proc Natl Acad Sci U S A. 2018 Jul 9;115(30):E7015–22. doi: 10.1073/pnas.1718193115 (PMC6065045; doi:10.1073/pnas.1718193115), 2018-07-09
Supplement: pnas.1718193115.sapp.pdf [file pnas.1718193115.sapp.pdf]

**SI appendix:**

**Supplementary figures**

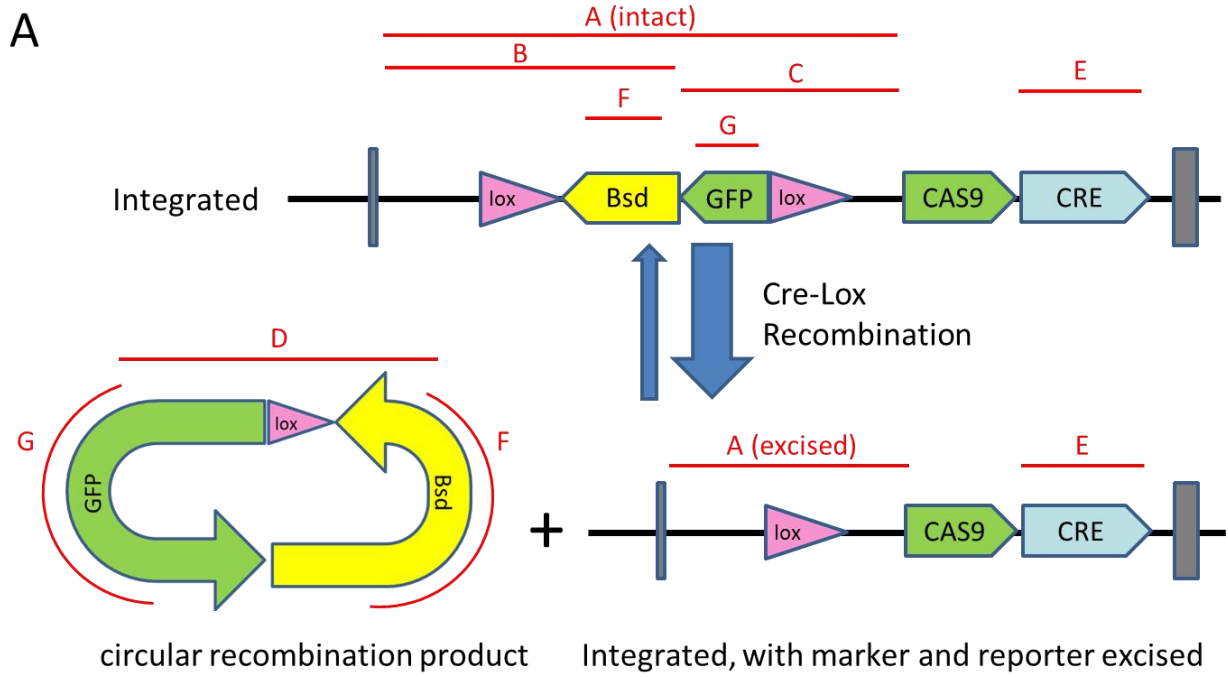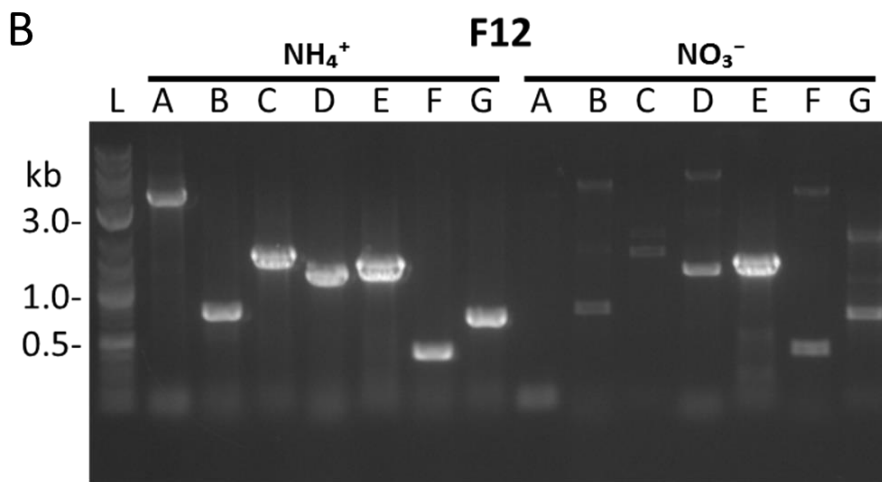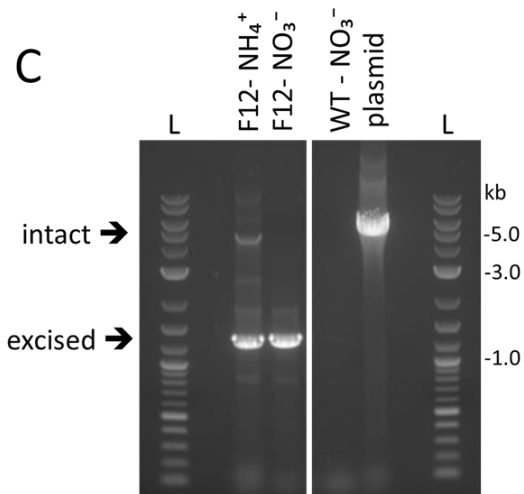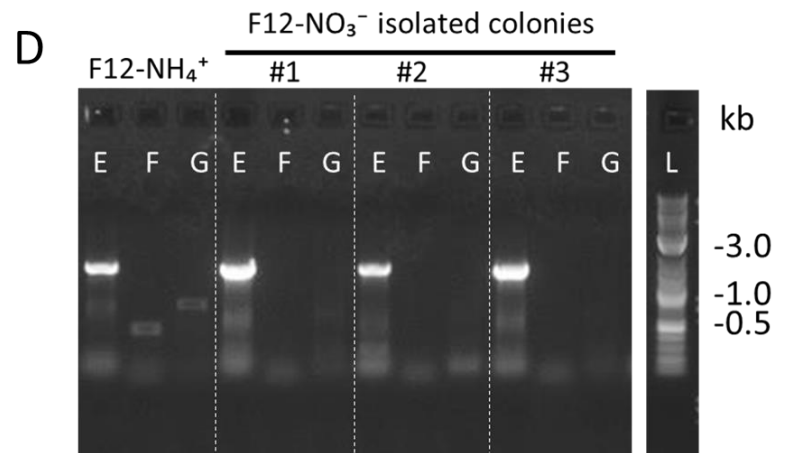

**Figure S1.** Molecular analysis of the progression from transformation to isolation of NgCAS9<sup>+</sup>Cre<sup>+</sup>. (A) Illustration of plasmid integration and subsequent excision of the floxed *GFP/Bsd* region, and expected amplicons from primer sets A-G (amplicons shown as red lines, not to scale). Expected amplicon sizes from the four main states of progression can be found in Table S3 (i.e. fully intact with no recombination, partially excised with circular recombination product remaining, fully excised with circular recombination product remaining, and fully excised with no circular recombination product remaining). Primer sequences can be found on Supplemental Table S1. (B) PCR assessment of Cre-mediated marker/reporter excision progress in NgCAS9<sup>+</sup>Cre<sup>+</sup> in CRM or CIM media. Primer set "A" spans the entire floxed region to detect the presence of intact floxed region (3.4 kb band), and/or a smaller 0.19 kb band indicating that recombination and excision have started to occur. Primer set "B" spans the 5' lox site, where an 0.85 kb band indicates intact floxed region and lack of a PCR amplicon indicates excision. Primer set "C" spans the 3' lox site where a 1.6 kb band indicates intact floxed region and lack of PCR amplicon indicates excision. Primer set "D" detects the presence of the circular recombination product; in the intact integrated state these primers are oriented away from each other, whereas in the circular recombination product they are oriented to produce an expected 1.3 kb band by PCR. Primer set "E" amplifies the Cre gene with an expected 1.4 kb band. Primer set "F" amplifies the Bsd gene with an expected band size of 0.4 kb. Primer set "G" amplifies the GFP gene with an expected 0.7kb gene. (C) Primer set "H" (Table S1) which produces a 1.3kb band for the excised form versus a 4.9kb band, included to provide better resolution of the excised form observed using primer set-A.(D) Analysis of single cell colony isolates from F12-NO<sub>3</sub><sup>-</sup> culture screened with primers to detect Cre, Bsd, and GFP (Primer sets "E", "F", "G" respectively). Isolate #2 was carried forward as the final NgCas9<sup>+</sup>Cre<sup>+</sup> strain. The Lane labeled "L" in all gels refers to the NEB 2-Log DNA Ladder (0.1-10.0 kb).

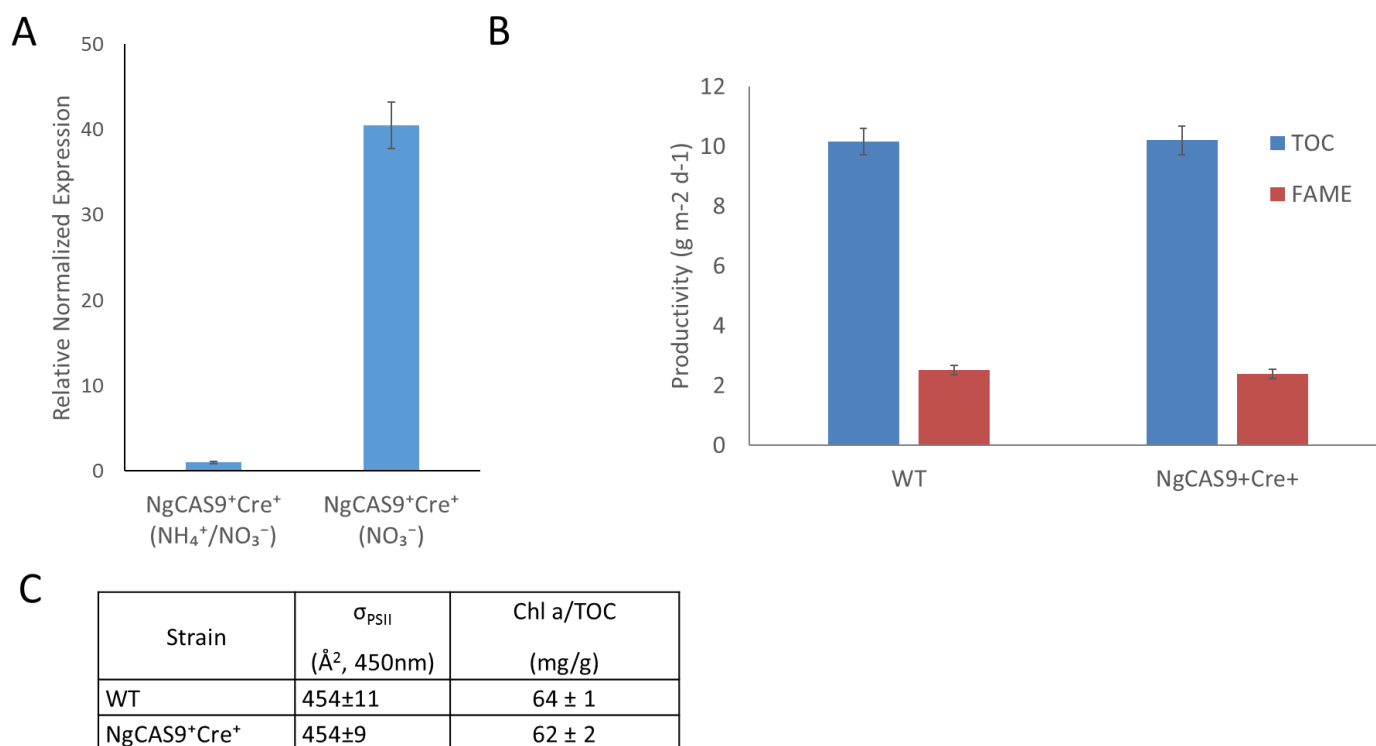

**Figure S2.** qRT-PCR analysis of Cre expression and comparison of NgCAS9<sup>+</sup>Cre<sup>+</sup> (22) and wild type (WT) strain performance under semi-continuous growth. (A) qRT-PCR results demonstrate that Cre expression is greatly repressed in the presence of NH<sub>4</sub><sup>+</sup>. Expression levels in NH<sub>4</sub><sup>+</sup>/NO<sub>3</sub><sup>-</sup> are given a value of 1, while expression levels in NO<sub>3</sub><sup>-</sup> are reported as relative to NH<sub>4</sub><sup>+</sup>/NO<sub>3</sub><sup>-</sup>. Expression levels were observed to increase by 40-fold in NO<sub>3</sub><sup>-</sup>. (B) Semi-continuous growth mode TOC (blue) and FAME (red) areal productivities for wild type *Nannochloropsis* (WT) and NgCAS9<sup>+</sup>Cre<sup>+</sup>. (C) Chlorophyll content and functional absorption cross section of PSII ( $\sigma_{\text{PSII}}$ ). Shown are the average and standard deviation of technical triplicates from cell culture duplicates (N = 6).

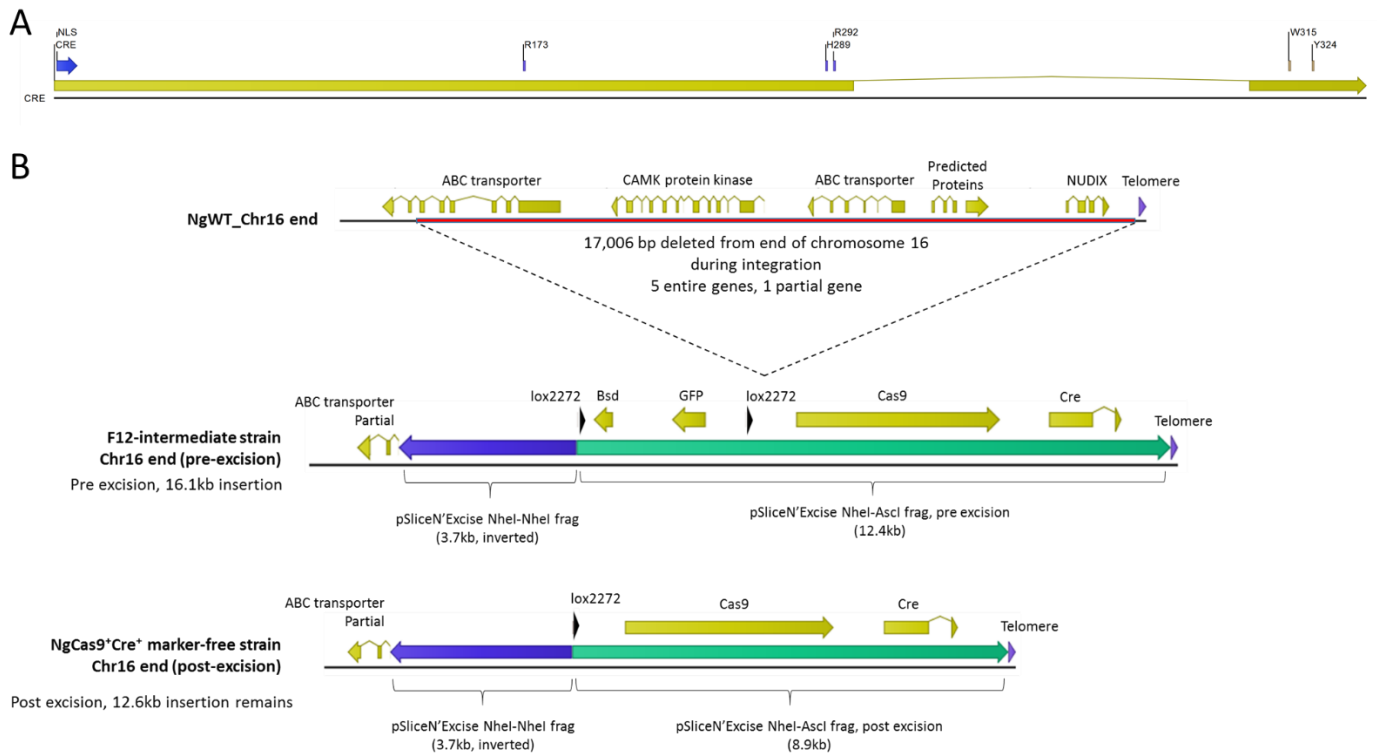

**Figure S3.** Architecture of the intronated recombinant Cre gene and locus of stable inserted Cas9 and Cre transgene in NgCAS9<sup>+</sup>Cre<sup>+</sup>. (A) Recombinant Cre gene has an N terminal NLS (SV40, shown in blue) and an intron from the native RPS4x gene transplanted between catalytic (R173, R289, and R292) and nucleophilic residues (W315 and Y324) to defunctionalize basal level CRE expression in *E.coli*. (B) Scheme depicting the integration of the Cas9 and Cre expression construct as deduced from PacBio genome sequencing of NgCas9<sup>+</sup>Cre<sup>+</sup>.

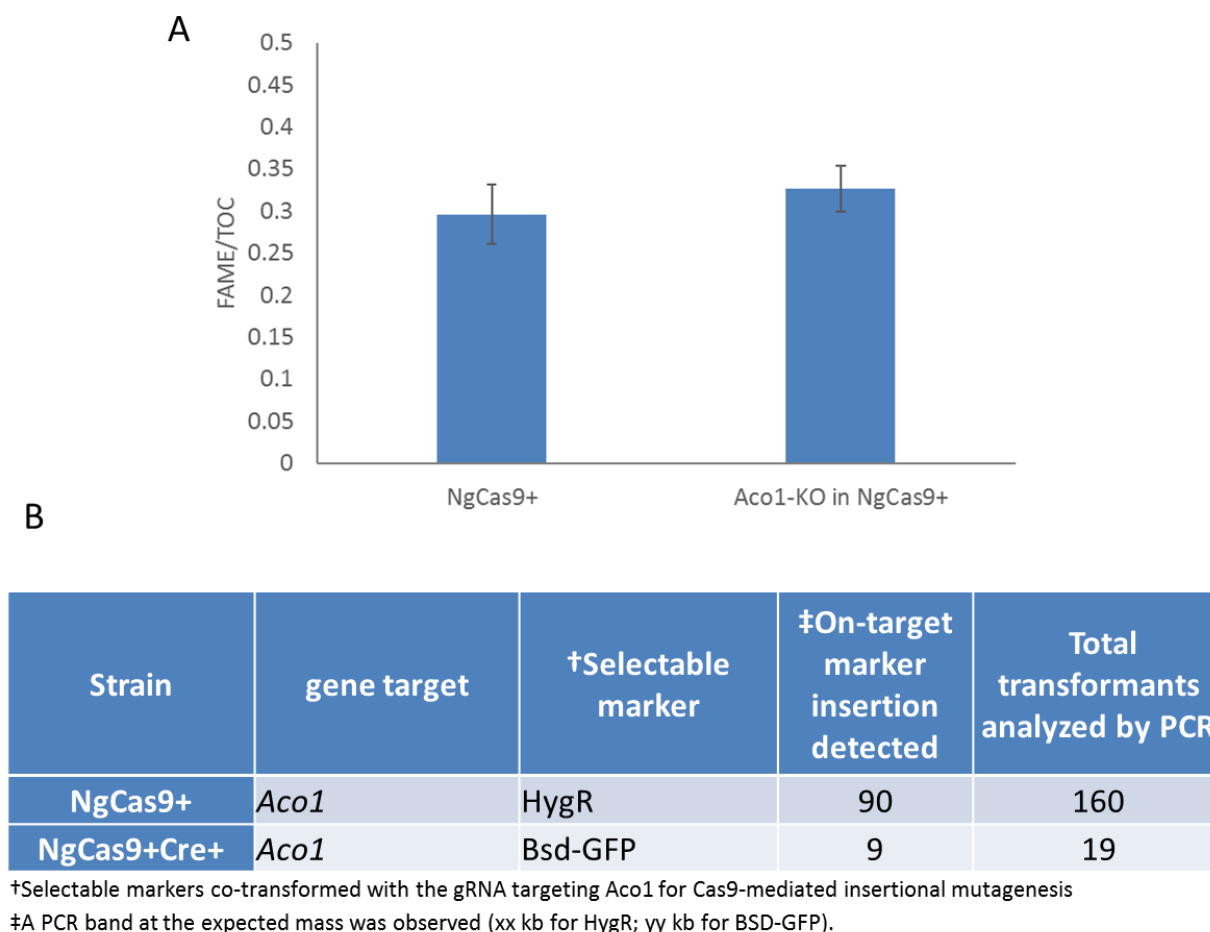

**Figure S4.** Comparison of Cas9 mediated insertional mutagenesis in NgCas9+ (22) and NgCas9+Cre+ generated in this study. (A) Characterization of carbon partitioning to lipid (FAME/TOC) in an acyl-CoA oxidase gene knockout (*Aco1*) generated in the previously published *Nannochloropsis* Cas9 editor line (NgCas9+). Cultures were grown in biological duplicate in batch mode as previously described (22), and FAME (fatty acid methyl ester) and TOC (total organic carbon) measurements were taken daily for three days. Shown is the average and standard deviation of the FAME/TOC ratio used as a proximate indicator of partitioning of carbon to lipid. (B) Summary of results for targeting the *Aco1* gene in the original Cas9 editor line NgCas9+ and in the NgCas9+Cre+ line described in this study. The number of on-target insertions vs the total number of transformants analyzed by PCR is shown.

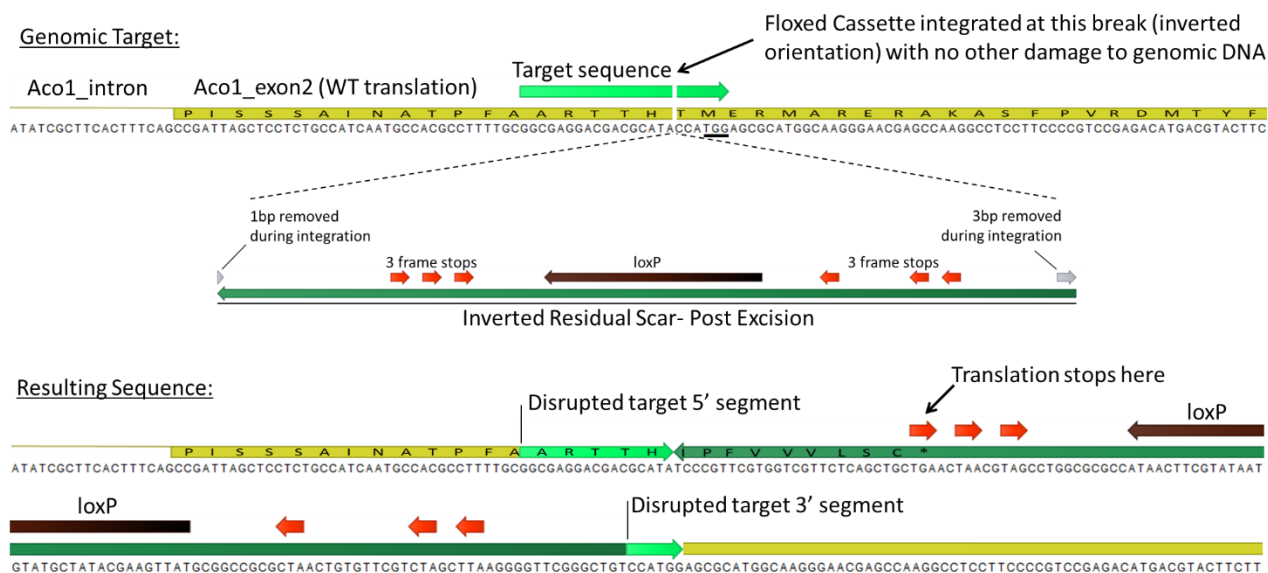

**Figure S5.** Diagram depicting PCR sequencing results at the *Aco1* knockout locus in isolates 1 to 3, where exon 2 was disrupted by the *lox* “scar” in an inverted orientation. The location and orientation of the insertion are indicated, as well as 1 and 3 bp deletions observed on the 5’ and 3’ ends of the integrated construct, respectively. All three isolates showed identical sequence results.

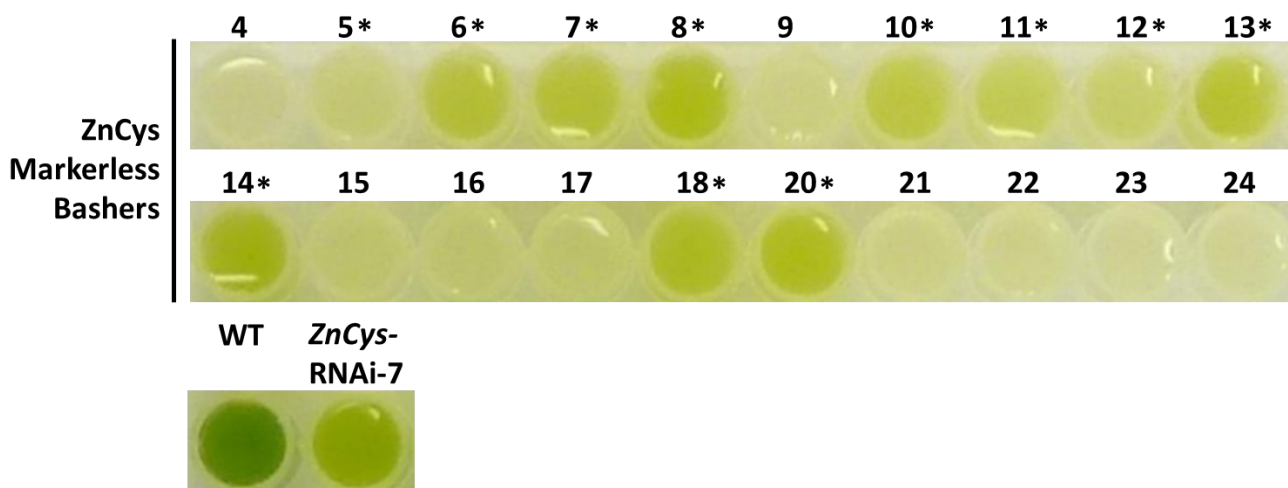

**Figure S6.** Range of pale phenotypes observed when *ZnCys* “5’-Bash” strains were cultured with medium containing  $\text{NO}_3^-$  as the sole N source, compared to wild type *Nannochloropsis gaditana*. A *ZnCys* RNAi strain from (22) was cultured in the same media, and strains exhibiting

visual pigmentation level comparable to the RNAi line were carried forward for isolation and genotyping (indicated here by asterisks).

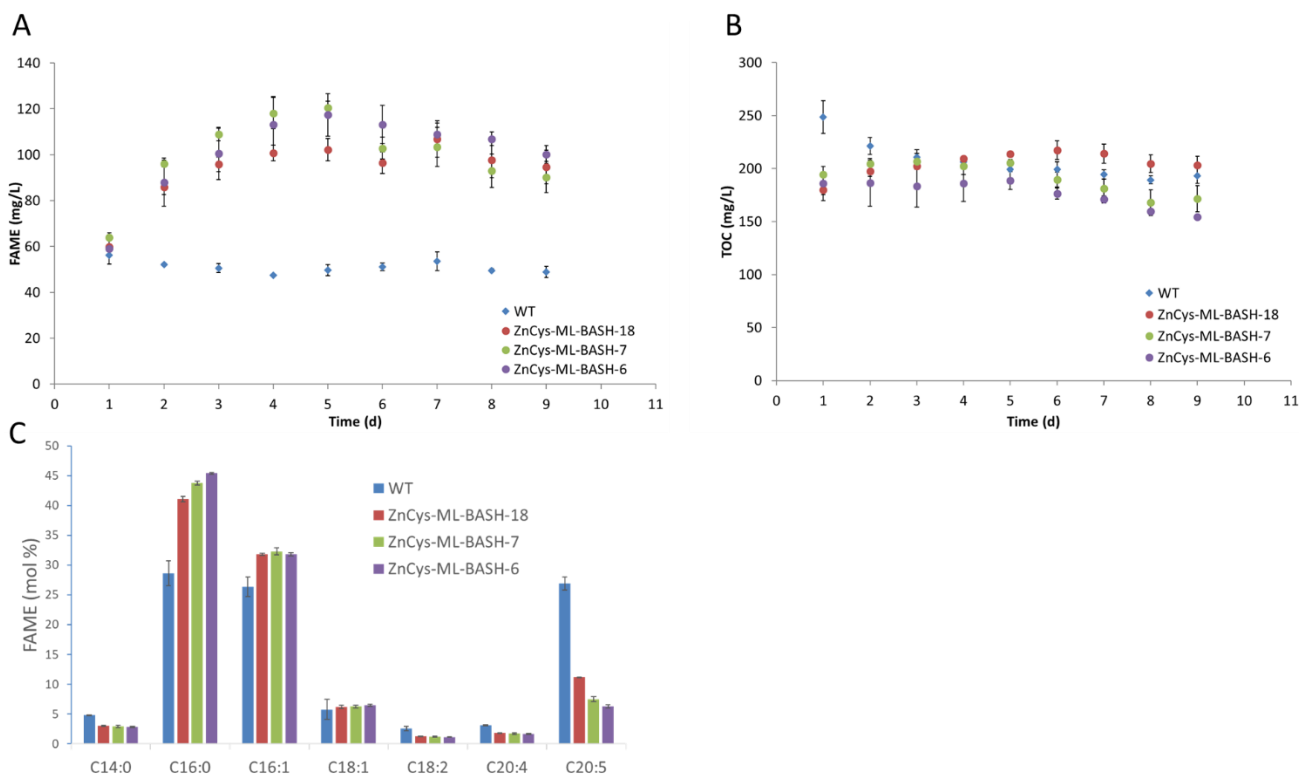

**Figure S7.** Volumetric FAME (A) and TOC (B) levels observed for wild-type and *Zncys-ML-BASH* lines under semi-continuous growth mode, where a 30 % daily dilution rate was applied. Shown are the average and standard deviation for biological triplicate cultures. Data from days 3 to 9 were used in the calculation of summary aerial productivities shown in Figure 3C. Total fatty acid profiles (C) were calculated from FAME data collected on day 5 of the run depicted in panels A and B.



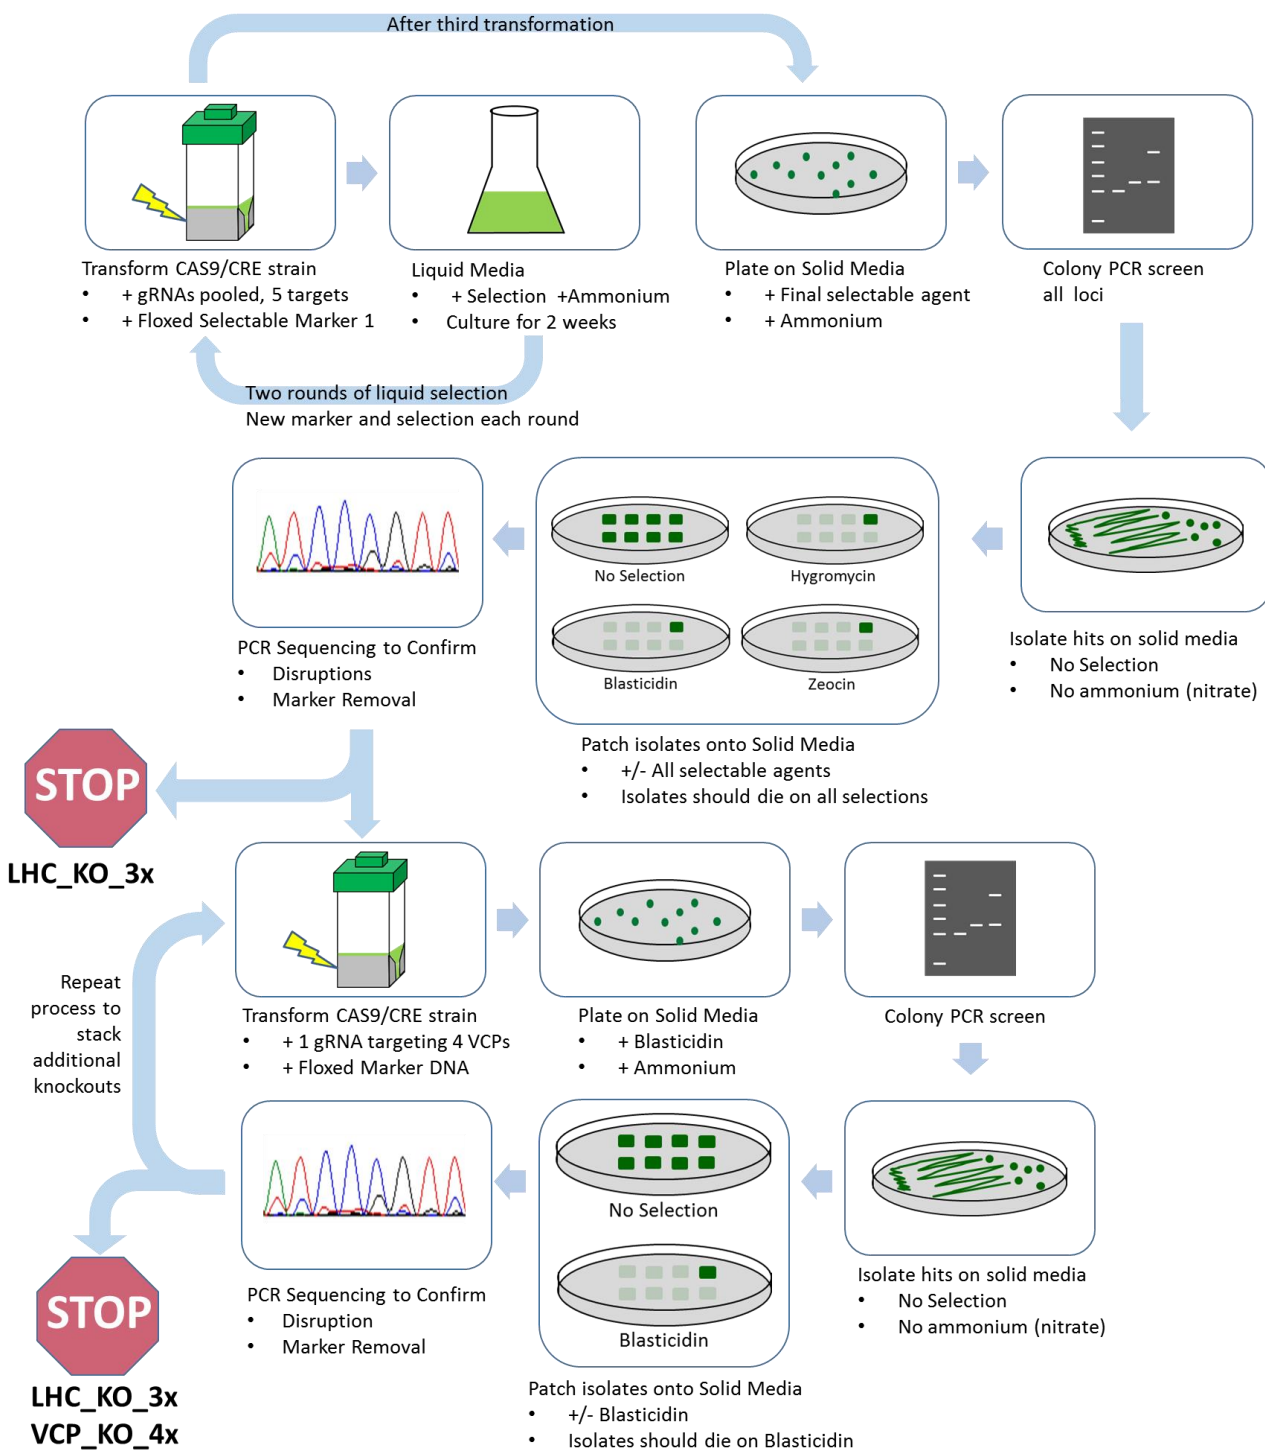

**Figure S8.** Rapid generation of strains harboring stacked knockout mutations in the light harvesting complex (LHC, non-VCP) and violaxanthin carrier protein (VCP) encoding gene families via a multiplexed iterative strategy in NgCAS9<sup>+</sup>Cre<sup>+</sup>. The diagram illustrates the method employed for the rapid stacking of knockouts, where briefly, the NgCAS9<sup>+</sup>Cre<sup>+</sup> strain was

transformed with 5 separate and unique gRNA molecules which target 5 highly expressed Light Harvesting Complex genes, and a floxed blasticidin resistance marker, and the transformed cells were inoculated into liquid media with blasticidin and  $\text{NH}_4^+$  and cultured for 2 weeks. This culture was then transformed with the same 5 gRNAs again, but this time with a floxed hygromycin resistance marker, and the transformed cells were inoculated into liquid media with hygromycin and  $\text{NH}_4^+$  and again cultured for 2 weeks. This culture was then transformed with the same 5 gRNAs, and a floxed zeocin resistance marker, and was plated onto solid media containing  $\text{NH}_4^+$  and zeocin. Transformants were screened for inserts at the 5 loci by colony PCR with locus specific primers, and potential hits were streaked out for isolation on solid media with no selection and no  $\text{NH}_4^+$ . Isolated lines were analyzed by colony PCR at the 5 loci using locus specific primers which yielded one line, LHC-3x-, that was shown to have residual lox scars inserted in three of the five target loci and was sensitive to all antibiotics used. LHC-3x- was then transformed with a single gRNA which targets four separate violaxanthin-chlorophyll-a genes (VCP 1-4) and a floxed blasticidin resistance marker. Transformants were screened by colony PCR using unique locus specific primers. After cre-mediated marker excision and plating to isolation, one line, LHC\_KO\_3x/VCP\_KO\_4x, was found to have all four loci disrupted.

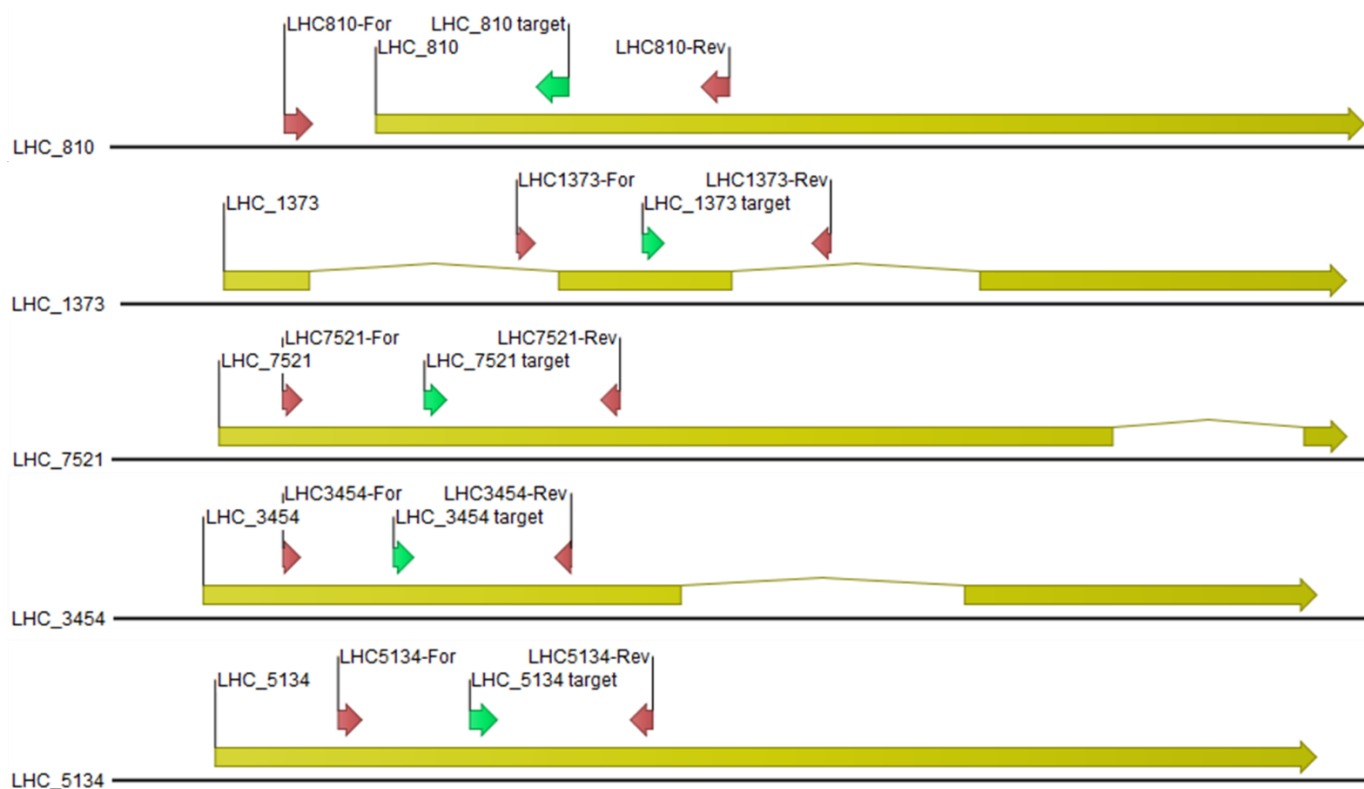

**Figure S9.** Five light harvesting complex (LHC, non-VCP) genes targeted for knockout and marker recycling. The coding sequences are shown in yellow, CRISPR targets in green, and screening primers in red.

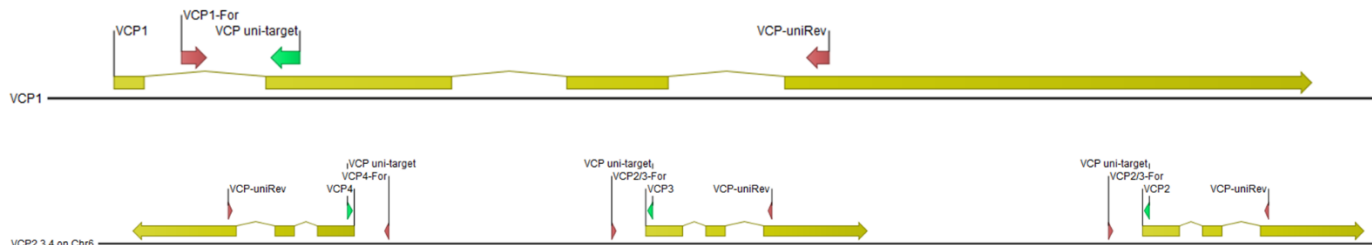

**Figure S10.** Light harvesting genes of the violaxanthin chlorophyll-a protein (VCP) family targeted for knockout and marker recycling. The coding sequences are shown in yellow, CRISPR targets in green, and screening primers in red.

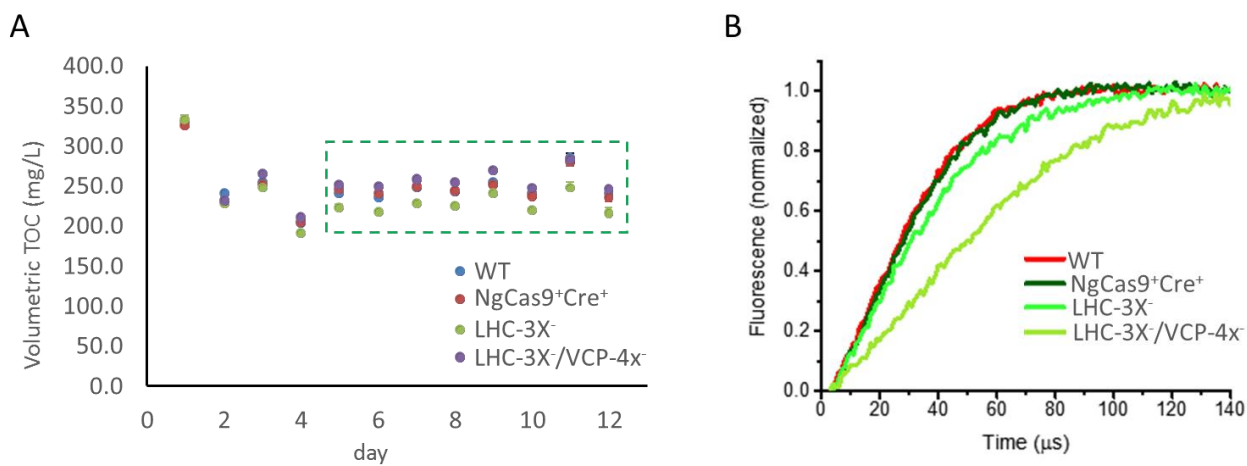

**Figure S11.** Characterization of LHC knockout strains for TOC productivity (A) and fluorescence induction (B) using the FIRE fluorimeter. Volumetric TOC for wild type (WT), NgCas9<sup>+</sup>Cre<sup>+</sup>, and the LHC mutants LHC-3X<sup>-</sup> and LHC-3X<sup>-</sup>/VCP-4X<sup>-</sup> represent the average and standard deviation of cell culture triplicates for cultures diluted daily at 30 %; the data points within the dashed green box were used in determining areal TOC productivities summarized in Figure 4.

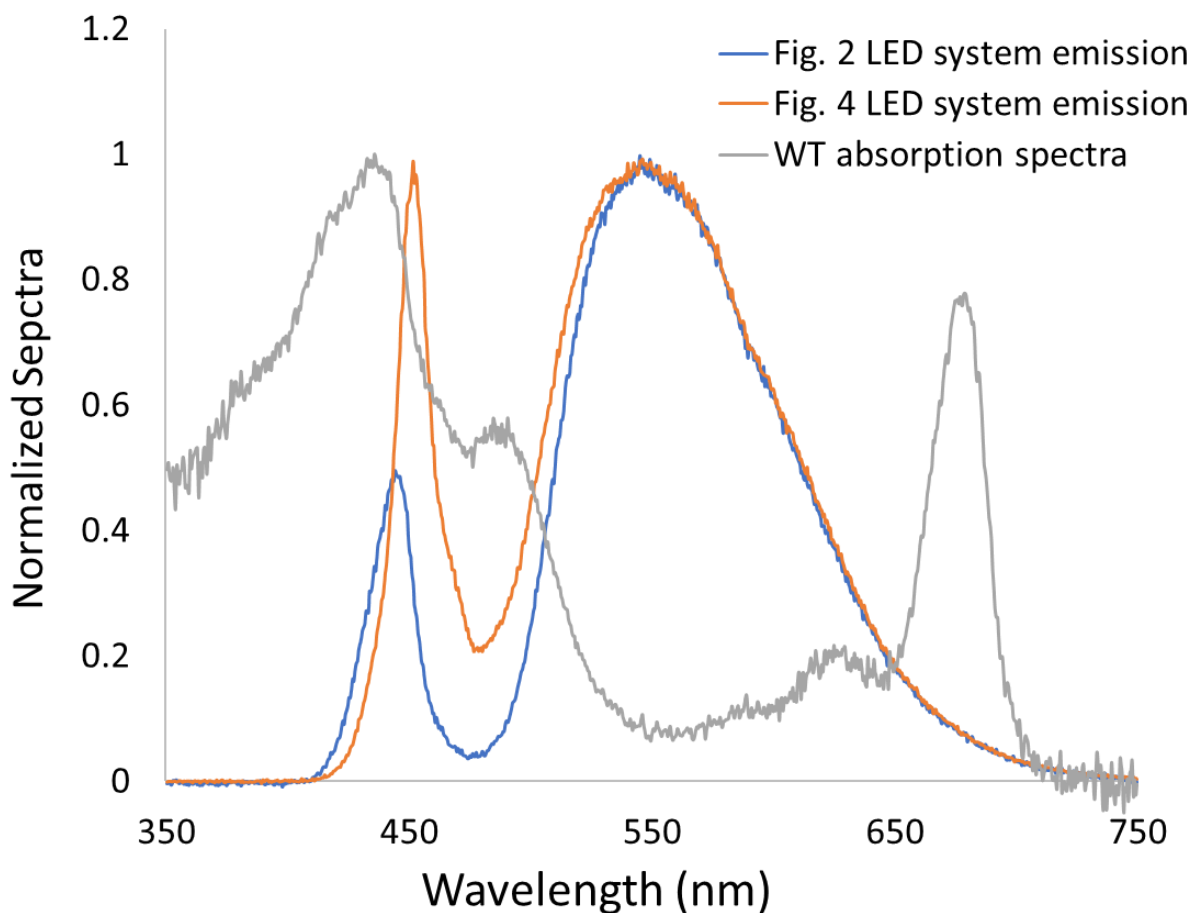

**Figure S12.** Peak normalized absorbance and emission spectra. Absorption spectra for wild type *N. gaditana* culture is shown in gray (measured using the Perkin Elmer Lambda 650 spectrophotometer as described in Methods). Emission spectra for the LED system used to assess strain productivity described in Figure 2 is shown in blue; Emission spectra for the updated LED system used to assess strain productivity in Figure 4 is shown in orange (both spectra were measured using Ocean Optics Jax Spectrometer). Spectra were normalized by setting the maxima to 1.

#### Supplemental tables:

**Table S1.** Primers used in this study.

| <b>I. Primers sequences used in analysis of the progression Cre-mediated marker removal leading to NgCAS9+Cre+.</b> |                                       |
|---------------------------------------------------------------------------------------------------------------------|---------------------------------------|
| A/B/H-For                                                                                                           | ctagcggccgcataac                      |
| A/C-Rev                                                                                                             | AAACCATAATATGCCGTACCAACTG             |
| F-For/B-Rev                                                                                                         | atggccaagcctttgtcc                    |
| C-For/G-Rev                                                                                                         | ttattcttcaccggcatctgc                 |
| D-For                                                                                                               | CACAGCGGTTGGCATCAGGGAGTTGC            |
| D-Rev                                                                                                               | ggtgatgcggcactcgatctccatgg            |
| E-For                                                                                                               | ggtgcatcagaacttcctgccttgcc            |
| E-Rev                                                                                                               | GCACCATTGCTCCCGTCTCGGAGTCC            |
| F-Rev                                                                                                               | tcaaccctcccagacgtagc                  |
| G-For                                                                                                               | atgttgagagcgacgagagc                  |
| G-Rev                                                                                                               | ttattcttcaccggcatctgc                 |
| H-Rev                                                                                                               | CTGAACTTCTTGAAGGCACC                  |
| <b>II. Screening Primers for CAS9 knockouts</b>                                                                     |                                       |
| Aco1-For                                                                                                            | TCAAAGATCATTTAGCAGAGACGGGGGCTGTGGCGCG |
| Aco1-Rev                                                                                                            | AGTCGAGAGATGGTGC GTTCACGGATCTAGCCAGAG |
| ZnCys-5'Bash-For                                                                                                    | TAGCAGAGCAGGCTCATCAC                  |
| ZnCys-5'Bash-Rev                                                                                                    | GAATATGTGGTCTAGCTCGT                  |
| LHC810-For                                                                                                          | CCCTTACTCCATCCCCAGAT                  |
| LHC810-Rev                                                                                                          | ACTCGTCCCACTTGGTAGGC                  |
| LHC1373-For                                                                                                         | TGGCTATGCTTCTCGTTCCT                  |
| LHC1373-Rev                                                                                                         | ATTCCCCACACGACATCTCT                  |
| LHC7521-For                                                                                                         | CTTCATGGGCAAGAACTTCG                  |
| LHC7521-Rev                                                                                                         | GCGAAATCAGGGTTGGATAG                  |
| LHC3454-For                                                                                                         | CTCTCCCTCCCGAAAACT                    |
| LHC3454-Rev                                                                                                         | GCACCGACTTCGAGAACAC                   |
| LHC5134-For                                                                                                         | TCTTCCTCCACCAGCTTTTT                  |
| LHC5134-Rev                                                                                                         | GGAGGGTTGTTGAGAAGC                    |
| VCP1-For                                                                                                            | GTCTTTCTGGCTGGACTTGC                  |
| VCP-uniRev                                                                                                          | GGTCACCAGGGTGTGGAG                    |
| VCP2/3-For                                                                                                          | GACCCCGGAGGATCTTAGAC                  |
| VCP4-For                                                                                                            | GGTCACCAGGGTGTGGAG                    |

**Table S2.** Cas9 sites for loci targeted in this study.

| <b>CAS9 target sites</b>              | <b>Sequence (PAM underlined)</b> |
|---------------------------------------|----------------------------------|
| Aco1 target (direct strand)           | GGCGAGGACGACGCATACCAT <u>GG</u>  |
| ZnCys_5'UTR target (direct strand)    | GGGACTGTCCCATTGTGCC <u>GG</u>    |
| LHC_810 target (complementary strand) | GGGGGCTTCCAGGAAAGGGAC <u>CGG</u> |
| LHC_1373 target (direct strand)       | GGCGAGCTTGTGGGGATGT <u>AGG</u>   |

|                                                            |                         |
|------------------------------------------------------------|-------------------------|
| LHC_7521 target (direct strand)                            | GGTCTCTATCCCCAAACCCGCGG |
| LHC_3454 target (direct strand)                            | GGCCCTTCTCTGCTCCTCCGCGG |
| LHC_5134 target (direct strand)                            | GGCCCGTCGTGCCACCGGCGCGG |
| VCP uni-target (direct strand, present in all 4 VCP genes) | GGAGACGGTGAGCAGAGCGGCGG |

**Table S3.** Description of expected PCR results for primer sets A-H.

| Primer Set | Amplifies                               | Expected PCR bands (kb) from four states of progression |                                                           |                                                       |                                                          |
|------------|-----------------------------------------|---------------------------------------------------------|-----------------------------------------------------------|-------------------------------------------------------|----------------------------------------------------------|
|            |                                         | Fully Intact, no recombination                          | Partially excised, circular recombination product remains | Fully excised, circular recombination product remains | Fully excised, no circular recombination product remains |
| A          | entire floxed region                    | 3.7                                                     | 0.185/3.7 (mix)                                           | 0.185                                                 | 0.185                                                    |
| B          | 5' lox site                             | 0.85                                                    | 0.85 (faint)                                              | no band                                               | no band                                                  |
| C          | 3' lox site                             | 1.6                                                     | 1.6 (faint)                                               | no band                                               | no band                                                  |
| D          | circular, excised recombination product | no band                                                 | 1.3                                                       | 1.3                                                   | no band                                                  |
| E          | Cre only                                | 1.4                                                     | 1.4                                                       | 1.4                                                   | 1.4                                                      |
| F          | Bsd only                                | 0.4                                                     | 0.4                                                       | 0.4                                                   | no band                                                  |
| G          | GFP only                                | 0.7                                                     | 0.7                                                       | 0.7                                                   | no band                                                  |
| H          | entire floxed region                    | 4.9                                                     | 1.3/4.9 (mix)                                             | 1.3                                                   | 1.3                                                      |

**Table S4.** Photophysiological phenotypes of LHC knockout lines grown under low incident irradiance as described in methods.

Data represent the average and standard deviation of biological duplicates.

| Strain                                   | $\sigma_{PSII}$<br>( $\text{\AA}^2$ , 450nm) | $\sigma_{PSII}$<br>( $\text{\AA}^2$ , 530nm) | $N_{chl}/PSII$ | $a_{chl}$<br>( $\text{m}^2/\text{g Chl}$ ) | Chl a/TOC<br>(mg/g) |
|------------------------------------------|----------------------------------------------|----------------------------------------------|----------------|--------------------------------------------|---------------------|
| Wild Type                                | 402 $\pm$ 2                                  | 163 $\pm$ 1                                  | 304 $\pm$ 9    | 4.0 $\pm$ 0.1                              | 79 $\pm$ 1          |
| LHC-3X <sup>-</sup>                      | 374 $\pm$ 1                                  | 143 $\pm$ 1                                  | 255 $\pm$ 3    | 4.1 $\pm$ 0.1                              | 66 $\pm$ 1          |
| LHC-3X <sup>-</sup> /VCP-4X <sup>-</sup> | 197 $\pm$ 2                                  | 92 $\pm$ 1                                   | 154 $\pm$ 6    | 4.9 $\pm$ 0.2                              | 45 $\pm$ 1          |

**Table S5.** Description of DNA construct elements.

| DNA element abbreviation      | Function                                                            | Source/Description                   |
|-------------------------------|---------------------------------------------------------------------|--------------------------------------|
| <b>BSD</b>                    | Blasticidin resistance gene                                         | codon optimized for N. gaditana      |
| <b>HygR</b>                   | Hygromycin resistance gene                                          | codon optimized for N. gaditana      |
| <b>Ble</b>                    | Bleomycin/Zeocin resistance gene                                    | codon optimized for N. gaditana      |
| <b>CAS9</b>                   | CAS9 harboring N-terminal NLS and Flag epitope tag                  | codon optimized for N. gaditana      |
| <b>CRE</b>                    | Cre recombinase harboring N-terminal NLS and intron from N.gaditana | codon optimized for N. gaditana      |
| <b>GFP</b>                    | Turbo green fluorescent protein (Evrogen)                           | amplified from pTurboGFP-C (Evrogen) |
| <b>TCT_P</b>                  | Promoter                                                            | Amplified from N. gaditana gDNA      |
| <b>RPL24_P</b>                | Promoter                                                            | Amplified from N. gaditana gDNA      |
| <b>4AIII_P</b>                | Promoter                                                            | Amplified from N. gaditana gDNA      |
| <b>EIF3_P</b>                 | Promoter                                                            | Amplified from N. gaditana gDNA      |
| <b>NIR_P</b>                  | Promoter (NH <sub>4</sub> <sup>+</sup> repressible)                 | Amplified from N. gaditana gDNA      |
| <b>EIF3_T</b>                 | Terminator                                                          | Amplified from N. gaditana gDNA      |
| <b>FRD_T (bi-directional)</b> | Terminator                                                          | Amplified from N. gaditana gDNA      |
| <b>GNPDA_T</b>                | Terminator                                                          | Amplified from N. gaditana gDNA      |
| <b>NIR_T</b>                  | Terminator                                                          | Amplified from N. gaditana gDNA      |
| <b>loxP</b>                   | lox site for recombination by Cre                                   | synthesized                          |
| <b>lox2272</b>                | lox site for recombination by Cre                                   | synthesized                          |
| <b>loxN</b>                   | lox site for recombination by Cre                                   | synthesized                          |

## .GB formatted sequence for pSliceN'Excise

```

LOCUS       pSliceN'Excise      21360 bp    DNA     circular UNA 10-SEP-2014
DEFINITION  Made by John Verruto.
COMMENT     This file is created by Vector NTI
            http://www.invitrogen.com/
FEATURES             Location/Qualifiers
     CDS             174..1340
                     /vntifkey="4"
                     /label=sopA/parA
     CDS             1340..2311
                     /vntifkey="4"
                     /label=sopB/parB
     Site            3533..3540
                     /site_type="restriction site"
                     /vntifkey="21"
                     /label="NotI site"
     misc_feature    3541..3574
                     /feature_type="lox sites"
                     /vntifkey="21"
                     /label=lox2272
     terminator      complement(3575..3892)
                     /vntifkey="43"
                     /label=EIF3_Term
                     /label="EIF3 Term"
     CDS             complement(3893..4291)
                     /vntifkey="4"
                     /label=BSD-ORF
                     /label=BSD
     promoter        complement(4313..5314)

```

```

/vntifkey="21"
/label="TCT_Pro (Sequence corrected)"
/label="TCT Prom"
Site 5315..5327
/site_type="restriction site"
/vntifkey="21"
/label="SfiI site"
terminator complement(5328..5527)
/vntifkey="43"
/label=Term5
/label="GPI2 Term"
CDS complement(5528..6229)
/vntifkey="4"
/label=GFP
promoter complement(6230..7051)
/vntifkey="21"
/label="Promoter 4AIII sequence corrected"
/label="4AIII Prom"
misc_feature 7052..7085
/feature_type="lox sites"
/vntifkey="21"
/label=lox2272
Site 7086..7093
/site_type="restriction site"
/vntifkey="21"
/label=SbfI
promoter 7119..8118
/vntifkey="29"
/label=WE3730_RPL24_Promoter
/label="RPL24 Prom"
CDS 8119..12369
/vntifkey="4"
/label=NLS-CAS9version2reducedPyStretches
/label=CAS9
misc_feature 8122..8145
/feature_type="Nuclear localization signals"
/vntifkey="21"
/label=NLS
misc_feature 8146..8169
/feature_type="epitope tags"
/vntifkey="21"
/label="FLAG tag"
terminator 12370..12686
/vntifkey="43"
/label=Term2
/label="FRD Term"
promoter 12712..13394
/vntifkey="29"
/label=nir9236_Promoter
/label="NIR Prom"
CDS join(13395..14315,14771..14905)
/vntifkey="4"
/label=CREopt3730_FullTranslation
/label=CRE
misc_feature 13398..13421
/feature_type="Nuclear localization signals"
/vntifkey="21"
/label=NLS2
misc_feature 13935..13937
/feature_type="Catalytic Residues of CRE"

```



```

misc_feature      /label=R173
                  14283..14285
                  /feature_type="Catalytic Residues of CRE"
misc_feature      /label=H289
                  14292..14294
                  /feature_type="Catalytic Residues of CRE"
intron            /label=R292
                  14316..14770
                  /vntifkey="15"
                  /label=Intron
misc_feature      14816..14818
                  /feature_type="Nucleophillic Residues of CRE"
                  /label=W315
misc_feature      14843..14845
                  /feature_type="Nucleophillic Residues of CRE"
                  /label=Y324
terminator        14906..15895
                  /vntifkey="43"
                  /label=nir9236_Terminator-PACBioCurated
                  /label="NIR Term"
Site              15921..15928
                  /site_type="restriction site"
                  /vntifkey="21"
                  /label="PacI site"
Site              15954..15961
                  /site_type="restriction site"
                  /vntifkey="21"
                  /label="AscI site"
CDS               complement(16193..16852)
                  /vntifkey="4"
                  /label=CmR
CDS               17071..17418
                  /vntifkey="4"
                  /label=redF
rep_origin        17813..18430
                  /vntifkey="33"
                  /label=oriV
                  /note="Unknown feature type:Replication_ori From
                  Epicentre annotation obtained by e-mail."
rep_origin        18431..18485
                  /vntifkey="33"
                  /label=oriS/ori2
                  /note="Unknown feature type:Replication_ori"
CDS               18814..19569
                  /vntifkey="4"
                  /label=repE/repA
                  /note="Initiation factor for ori2"
promoter          20489..20649
                  /vntifkey="29"
                  /label="HIS3 promoter (Struhl 1982)"
                  /note="Unknown feature type:Promoter"
CDS               20676..21335
                  /vntifkey="4"
                  /label=HIS3
                  /note="HIS3 imidazoleglycerolphosphate dehydratase"
ORIGIN
1 GCTAGTGATA ATAAGTGACT GAGGTATGTG CTCTTCTTAT CTCCTTTTGT AGTGTGGCTC
61 TTATTTTAAA CAACTTTTCG GTTTTTTGAT GACTTTGCGA TTTTGTTGTT GCTTTGCAGT
121 AAATTGCAAG ATTTAATAAA AAAACGCAAA GCAATGATTA AAGGATGTTC AGAATGAAAC
181 TCATGGAAAC ACTTAACCAG TGCATAAACG CTGGTCATGA AATGACGAAG GCTATCGCCA

```

241 TTGCACAGTT TAATGATGAC AGCCCGGAAG CGAGGAAAAT AACCCGGCGC TGGAGAATAG  
 301 GTGAAGCAGC GGATTTAGTT GGGGTTTCTT CTCAGGCTAT CAGAGATGCC GAGAAAGCAG  
 361 GGC GACTACC GCACCCGGAT ATGGAAATTC GAGGACGGGT TGAGCAACGT GTTGTTTATA  
 421 CAATTGAACA AATTAATCAT ATGCGTGATG TGTTTGGTAC GCGATTGCGA CGTGCTGAAG  
 481 ACGTATTTCC ACCGGTGATC GGGGTTGCTG CCCATAAAGG TGGCGTTTAC AAAACCTCAG  
 541 TTTCTGTTCA TCTTGCTCAG GATCTGGCTC TGAAGGGGCT ACGTGTTTTG CTCGTGGAAG  
 601 GTAACGACCC CCAGGGAACA GCCTCAATGT ATCACGGATG GGTACCAGAT CTTCATATTC  
 661 ATGCAAGAAGA CACTCTCCTG CCTTCTATC TTGGGGAAAA GGACGATGTC ACTTATGCAA  
 721 TAAAGCCAC TTGCTGGCCG GGGCTTGACA TTATTCCTTC CTGTCTGGCT CTGCACCGTA  
 781 TTGAAACTGA GTTAATGGGC AAATTTGATG AAGGTAAGT GCCCACCGAT CCACACCTGA  
 841 TGCTCCGACT GGCCATTGAA ACTGTTGCTC ATGACTATGA TGTCATAGT ATTGACAGCG  
 901 CGCCTAACCT GGGTATCGGC ACGATTAATG TCGTATGTGC TGCTGATGTG CTGATTGTTC  
 961 CCACGCCTGC TGAGTTGTTT GACTACACCT CCGCACTGCA GTTTTTCGAT ATGCTTCGTG  
 1021 ATCTGCTCAA GAACGTTGAT CTTAAAGGGT TCGAGCCTGA TGTACGTATT TTGCTTACCA  
 1081 AATACAGCAA TAGCAATGGC TCTCAGTCCC CGTGGATGGA GGAGCAAATT CGGGATGCCT  
 1141 GGGGAAGCAT GGTTCTAAAA AATGTTGTAC GTGAAACGGA TGAAGTTGGT AAAGGTCAGA  
 1201 TCCGGATGAG AACTGTTTTT GAACAGGCCA TTGATCAACG CTCTTCAACT GGTGCCTGGA  
 1261 GAAATGCTCT TTCTATTTGG GAACCTGTCT GCAATGAAAT TTTGATCGT CTGATTAAC  
 1321 CACGCTGGGA GATTAGATAA TGAAGCGTGC GCCTGTTATT CCAAAACATA CGCTCAATAC  
 1381 TCAACCGGTT GAAGATACTT CGTTATCGAC ACCAGCTGCC CCGATGGTGG ATTCGTTAAT  
 1441 TGCGCGCGTA GGAGTAATGG CTCGCGGTAA TGCCATTACT TTGCCTGTAT GTGGTCGGGA  
 1501 TGTGAAGTTT ACTCTTGAAG TGCTCCGGGG TGATAGTGTT GAGAAGACCT CTCGGGTATG  
 1561 GTCAGGTAAT GAACGTGACC AGGAGCTGCT TACTGAGGAC GCACTGGATG ATCTCATCCC  
 1621 TTTCTTTTCTA CTGACTGGTC AACAGACACC GGCGTTCCGT CGAAGAGTAT CTGGTGCAT  
 1681 AGAAATTGCC GATGGGAGTC GCCGTCGTAA AGCTGCTGCA CTTACCGAAA GTGATTATCG  
 1741 TGTTCTGGTT GCGGAGCTGG ATGATGAGCA GATGGCTGCA TTATCCAGAT TGGGTAACGA  
 1801 TTATCGCCCA ACAAGTGCTT ATGAACGTGG TCAGCGTTAT GCAAGCCGAT TGCAGAATGA  
 1861 ATTTGCTGGA AATATTTCTG CGCTGGCTGA TGCGGAAAAT ATTTACAGTA AGATTATTAC  
 1921 CCGCTGTATC AACACCCCCA AATTGCCTAA ATCAGTTGTT GCTCTTTTTT CTCACCCCGG  
 1981 TGAACATCT GCCCGGTCCAG GTGATGCACT TCAAAAAGCC TTTACAGATA AAGAGGAATT  
 2041 ACTTAAGCAG CAGGCATCTA ACCTTCATGA GCAGAAAAAA GCTGGGGTGA TATTTGAAGC  
 2101 TGAAGAAAGTT ATCACTCTTT TAACCTCTGT GCTTAAAAACG TCATCTGCAT CAAGAACTAG  
 2161 TTTAAGTCA CGACATCAGT TTGCTCCTGG AGCGACAGTA TTGTATAAGG GCGATAAAAT  
 2221 GGTGCTTAAC CTGGACAGGT CTCGTGTTCC AACTGAGTGT ATAGAGAAAA TTGAGGCCAT  
 2281 TCTTAAGGAA CTTGAAAAGC CAGCACCTG ATGCGACCAC GTTTTAGTCT ACGTTTATCT  
 2341 GTCTTACTT AATGTCCTTT GTTACAGGCC AGAAAGCATA ACTGGCCTGA ATATTCCTC  
 2401 TGGGCCCACT GTTCCACTTG TATCGTCGGT CTGATAATCA GACTGGGACC ACGGTCCCAC  
 2461 TCGTATCGTC GGTCTGATTA TTAGTCTGGG ACCACGGTCC CACTCGTATC GTCGGTCTGA  
 2521 TTATTAGTCT GGGACCACGG TCCCCTCGT ATCGTCGGT TGATAATCAG ACTGGGACCA  
 2581 CGGTCCCCTC CGTATCGTCG TCTGATTAT TAGTCTGGGA CCATGGTCCC ACTCGTATCG  
 2641 TCGGTCTGAT TATTAGTCTG GGACCACGGT CCCACTCGTA TCGTCGGTCT GATTATTAGT  
 2701 CTGGAACCAC GGTCCCCTC GTATCGTCGG TCTGATTATT AGTCTGGGAC CACGGTCCCA  
 2761 CTCGTATCGT CGGTCTGATT ATTAGTCTGG GACCACGATC CCACTCGTGT TGTCGGTCTG  
 2821 ATTATCGGTC TGGGACCACG GTCCCCTTG TATTGTCGAT CAGACTATCA GCGTGAGACT  
 2881 ACGATTCCAT CAATGCCTGT CAAGGGCAAG TATTGACATG TCGTCGTAAC CTGTAGAACG  
 2941 GAGTAACCTC GGTGTGCGGT TGTATGCCTG CTGTGGATTG CTGCTGTGTC CTGCTTATCC  
 3001 ACAACATTTT GCGCACGGTT ATGTGGACAA AATACCTGGT TACCCAGGCC GTGCCGGCAC  
 3061 GTTAACCGGG CTGCATCCGA TGCAAGTGTG TCGCTGTGCA CGAGCTCGCG AGCTCGGACA  
 3121 TGAGGTTGCC CCGTATTCAG TGTCGCTGAT TTGTATTGTC TGAAGTTGTT TTTACGTTAA  
 3181 GTTGATGCAG ATCAATTAAT ACGATACCTG CGTCATAAAT GATTATTTGA CGTGGTTTGA  
 3241 TGGCCTCCAC GCACGTTGTG ATATGTAGAT GATAATCATT ATCACTTTAC GGGTCTTTTC  
 3301 CGGTGATCCG ACAGGTTACG TGGCGGCGAC CTCGCGGGTT TTCGCTATT ATGAAAATTT  
 3361 TCCTGTTTAA GCGGTTTCCG TTCTTCTTCG TCATAACTTA ATGTTTTTAT TAAAAATACC  
 3421 CTCTGAAAAG AAAGGAAACG ACAGGTGCTG AAAGCGAGCT TTTTGGCCTC TGTCGTTTCC  
 3481 TTTCTCTGTT TTTGTCCGTG GAATGAACAA TGGAAGTCCG AGCTCATCGC TAGCGGCCGC  
 3541 ATAACCTCGT ATAGGATACT TTATACGAAG TTATCGTATG GTCGACGGTT GCTCGGATGG  
 3601 GGGGGGCGGG GAGCGATGGA GGGAGGAAGA TCAGGTAAGG TCTCGACAGA CTAGAGAAGC  
 3661 ACGAGTGCAG GTATAAGAAA CAGCAAAAAA AAGTAATGGG CCCAGGCCTG GAGAGGGTAT  
 3721 TTGTCTTGTT TTTCTTTGGC CAGGAACTTG TTCTCCTTTC TTCGTTTCTA GGACCCCGAT  
 3781 CCCCCTCGC ATTTCTCTCT TCCTCAGCCG AAGCGCAGCG GTAAAGCATC CATTTTATCC

3841 CACCGAAAGG GCGCTCCCAG CCTTCGTCGA GCGGAACCGG GGTTACAGTG CCTCAACCT  
3901 CCCAGACGTA GCCAGAGGGA AGCAACTCCC TGATGCCAAC CGCTGTGGGC TGCCCATCGG  
3961 AATCTTTGAC AATTGCCTTG ATCCCCGGGT GCAAGTCAAG CAGCACCTGC CGACATCGCC  
4021 CGCACGGAGA CAGAATGCCG CGGTTTTCTG TCCCGATGGC CACTATGCAC GTCAGATTTT  
4081 CGGCAGCAGC CGCAGCGGCC GTTCCGAGGA CCACGAGCTC CGCGCATGGC CCTCCGGTGA  
4141 AATGATATA ATTCACGCCG GTAAGATCC GACCGTCGGA CGAGAGGGCT GCACTGGCCA  
4201 CCGAGTAGTC CTCGCTAATA GGTATGCTGT TGATGGTCGC AGTTGCACGT TCGATCAGCG  
4261 TGGATTCTCT TTGGGATAAA GGCTTGCCCA TCGAGCTCGG TACCCGGGGA TCCATGATTG  
4321 TTGTATTATG TACCTATGTT TGTGATGAGA CAATAAATAT GAGAAGAGAA CGTTGCGGCC  
4381 ACTTTTTTCT CCTTCCTTCG CGTGTCTATG TTGGTGGTTT GGGAGGCAGA AGATGCATGG  
4441 AGCGCCACAC ATTCGGTAGG ACGAAACAGC CTCCCCACA AAGGGACCAT GGGTAGCTAG  
4501 GATGACGCAC AAGCGAGTTC CCGCTCTCGA AGGGAACCC AGGCATTTCC TTCCTCTTTT  
4561 CAAGCCACTT GTTCACGTGT CAACACAATT TTGGACTAAA ATGCCCTCG GAACTCGGCA  
4621 GGCCTCCCTG TGCTCCGTTG TCCTGGTCGC CGAGAACGCG AGACCGTGCC GCATGCCATC  
4681 GATCTGCTCG TCTGTACTAC TAATCGTGTG CGTGTTCGTG CTTGTTTCGC ACGAAATTGT  
4741 CCTCGTTCGG CCCTACAAC GGTGGAATC GGTGCTAGAA TAAAGTGAGG TGGCTTATTT  
4801 CAATGGCGCG CGTCATCATG CGGGATCAAC TGAAGTACGG CGGGTTCTCG AGATTTTCATC  
4861 GTGCTCGTCC AGAGCAGGTG TTTTGCTGCG AGCTCTTCAT GTTTAGGGGT CATGATTTCA  
4921 TCTGATATGC CGTAAGAAAA CCAATATTCA CTTCTCAATT TTCCATGGAA AGGTGAAGGC  
4981 CTAGTTGTG TGCGAGGCAA CGACTGGGGA GGGATCGCAA CATTCTTGCT AACCTCCCTT  
5041 CTATCTTGGC CGCTGTGAAT CGGCATATTT ACCGGGCTGA ATTGAGAAAG TGTTTTGAGG  
5101 GAATTAAGG GTGGCTGTCT TGCAAGCTTG GCTTCAGTGC CTGCTTAATT CGAACCATC  
5161 CAGCTTGTGA TGAGGCCTTC CTAAGCCTGG TAGTCAGAAG CGACATGGCG CTATAAATTT  
5221 CGTCTCAGTT GGAGAGTAGA AAAGCATGAT TCGAACACGG TTTTCAACTG CCAAAGATAT  
5281 CTCCATTGTT TCCTTCAATC TGTACACCTG CACGGGCCAG TGAGGCCAGG AAATAAAGAT  
5341 GGACAGACGG CATGCTAGTA GACTTTGTTG AGATTAGTGT TTGTGTTCTG CTTTATGGCT  
5401 TTGAGTGGGC CCCCTTAACC TATACACACA TGACAATCAG GTGACGAGGA AGCTCTCGAC  
5461 TCTCCAGGTC TCCAACACAT CATGAGGACG CCGCTCTGCC AGGACCTCC CCGACTCCTT  
5521 CCCACCTTA TTCTTACCAG GCATCTGCAT CCGGGGTCTT GAAGGCGTGC TGGTACTCCA  
5581 CGATGCCAG CTCGGTGTG CTGTGATCCT CCTCCACGCG GCGGAAGGCG AACATGGGGC  
5641 CCCCCTTCTG CAGGATGCTG GGGTGGATGG CGCTCTTGAA GTGCATGTGG CTGTCCACCA  
5701 CCGAGCTGTA GTAGCCGCGG TCGCGCAGGC TGAAGGTGCG GGTGAAAGCTG CCATCCAGAT  
5761 CGTTATCGCC CATGGGGTGC AGGTGCTCCA CGGTGGCGTT GCTGCGGATG ATCTTGTCTG  
5821 TGAAGATCAC GCTGTCTCTG GGGAAAGCCG TGCCCATCAC CTTGAAGTCG CCGATCACGC  
5881 GGCCGGCCTC GTAGCGGTAG CTGAAGCTCA CGTGCAGCAC GCCGCCGTCC TCGTACTTCT  
5941 CGATCGGGGT GTTGTGTAG CCGCGTTGT TGATGCGGTG CAGGAAGGGG TTCTCGTAGC  
6001 CGCTGGGGTA GGTGCCAAG TGGTAGAAGC CGTAGCCCAT CACGTGGCTC AGCAGGTAGG  
6061 GGCTGAAGGT CAGGGCGCCT TTGGTGTCTT TCATCTTGTT GGTGATGCGG CCCTGCTCGG  
6121 GGGTGCCTC TCCGCCGCC ACCAGCTCGA ACTCCACGCG GTTCAGGGTG CCGGTGATGC  
6181 GGCACTCGAT CTCCATGGCG GCGAGCCGCG TCTCGTCGCT CTCCAACATG TAAGTAGGC  
6241 TTTTGGTGAG AGAATGGGAA AGAAGTTAGA TGTAATAATTG AACTTCGGTT GTCGAATTTT  
6301 AGAGGTAGTG CGCGGTGCGT GCGCAACGAA GGACCGTCTG CGACAGTCGG AGAGAATTGG  
6361 GGTAGCCACT AGAGTAGAAA ACCTTCACTT TCCCGCTGA GCACCGTTTC TGGAAAGGAT  
6421 CTGAAGATTG AGATATGATT TTTTCAACTT GCACCGATGT GGCCCTCGTG TAGAAGACGA  
6481 GGCAGAGTGG ATATAGTGCC ACTGAAGACA TGCAGCAAGC TACCGAACA CGCGATAATG  
6541 GAGACTAGCG CGTCTGCCAT TGGCAACCGT GCTCGCCTTC TCGTGATCTT ACGTGTCTCG  
6601 TCTCTTATC TCCGTACACG AAAAAATTG GTATGCGCGT GCATTATGCT TTCAGTACGT  
6661 GTAAATGAGA GACAGGCAAT GCCACACTAC TGGCGCAGGA CATGTTATCC TCATCCGGGT  
6721 CGCTTTTCTT GCTCTATGCA AGGAAAGGGG CGGAAATGAT AGAGATTGAT AAATTGATCG  
6781 ACGCGGAAGA GTTATTACTC TGCATGACAA TGAAGTGTGC TTTTAAAGTT TTGTTTATCG  
6841 AGAGGCTCG TGCGAGAAAT TTTTGTGCGA GCATGATTGA CTTGTAGGAT AGATACTAGC  
6901 TGGACTGGTC TTCGACATCC CTACACCTCC TGCCAACCGG AAAAAAAAG CATCTGTCTG  
6961 CTGCACACAG ATTGCGACTA CTTATAACTT CAAACTATGC TATAAGTGTG CTTTTCTTTC  
7021 TTTCTTTTCT TTCCTTGCCG TCCTTTATGC CATAACTTCG TATAGGATAC TTTATACGAA  
7081 GTTATCTCTG AGGCAGTTGG TACGGCATAT TATGGTTTAA TAAGCATACA TCATATGAAT  
7141 ACAATTCAGC TTAATTTTAT CATACAAAGA TGAAGTGTCA GCGTGGGTCT GTAACGATCG  
7201 GCGCTAATTT AAGATAATGC GAGGACCGG GGGAGGTTTT GGAACGGAAT GAGGAATGGG  
7261 TCATGGCCCA TAATAATAAT ATGGGTTTGG TCGCCTCGCA CAGCAACCGT ACGTGCGAAA  
7321 AAGGAACAGA TCCATTTAAT AAGTTGAACG TTATTCTTTC CTATGCAATG CGTGTATCGG  
7381 AGGCGAGAGC AAGTCATAGG TGGCTGCGCA CAATAATTGA GTCTCAGCTG AGCGCCGTCC

7441 GCGGGTGGTG TGAGTGGTCA TCCTCTCCC GGCCTATCGC TCACATCGCC TCTCAATGGT  
7501 GGTGGTGGGG CCTGATATGA CCTCAATGCC GACCCATATT AAAACCCAGT AAAGCATTCA  
7561 CCAACGAACG AGGGGCTCTT TTGTGTGTGT TTTGAGTATG ATTTTACACC TCTTTGTGCA  
7621 TCTCTCTGGT CTTCCTTGGT TCCCCTAGTT TGGGCATCAT CACTCACGCT TCCCTCGACC  
7681 TTCGTTCTTC CTTTACAACC CCGACACAGG TCAGAGTTGG AGTAATCAAA AAAGGGGTGC  
7741 ACGAATGAGA TACATTAGAT TTTGACAGAT ATCCTTTTAC TGGAGAGGGT TCAAGGGATC  
7801 AAATGAACAG CGGGCGTTGG CAATCTAGGG AGGGATCGGA GGTGGCAGC GAGCGAAAGC  
7861 GTGTCATCC TTTTGGCTGT CACACCTCAC GAACCAACTG TTAGCAGGCC AGCACAGATG  
7921 ACATACGAGA ATCTTTATTA TATCGTAGAC CTTATGTGGA TGACCTTGG TGCTGTGTGT  
7981 CTGGCAATGA ACCTGAAGGC TTGATAGGGA GGTGGCTCCC GTAAACCCTT TGTCCTTTCC  
8041 ACGCTGAGTC TCCCCCGCAC TGTCCTTTAT ACAAATTGTT ACAGTCATCT GCAGGCGGTT  
8101 TTTCTTTGGC AGGCAAAGAT GCCAAAGAAA AAGCGGAAGG TCGGGCGACTA CAAGGATGAC  
8161 GATGACAAGT TGGAGCCTGG AGAGAAGCCC TACAAATGCC CTGAGTGC GG AAAGAGCTTC  
8221 AGCCAATCTG GAGCCTTGAC CCGGCATCAA CGAACGCATA CACGAGACAA GAAGTACTCC  
8281 ATCGGGCTGG ACATCGGGAC GAACCTCGTG GGATGGGCGG TGATCACAGA CGAATACAAG  
8341 GTGCCTTCCA AGAAGTTCAA GGTGCTGGGG AACACGGACA GACACTCCAT CAAGAAGAAC  
8401 CTCATCGGGG CTTTGTCTTT CGACTCCGGA GAAACCGCGG AAGCAACGCG ATTGAAAAGA  
8461 ACCGCCAGAA GACGATACAC ACGACGGAAG AACC GCATCT GCTACCTCCA GGAGATCTTC  
8521 AGCAACGAGA TGGCCAAGGT GGACGACTCG TTCTTTTCATC GCCTGGAGGA GAGCTTCTG  
8581 GTGGAGGAAG ACAAGAAAACA TGAGCGCCAC CCGATCTTCG GGAACATCGT GGACGAAGTG  
8641 GCCTACCACG AGAAATACCC CACGATCTAC CACTTGC GCA AGAAACTCGT GGACTCCACG  
8701 GACAAAGCGG ACTTGC GGT GATCTACTTG GCCTTGGCCC ACATGATCAA ATTTCCGGGC  
8761 CACTTCTGGA TCGAGGGCGA CTTGAATCCC GACAATTCGG ACCTGGACAA GCTCTTCATC  
8821 CAGCTTGTGC AGACCTACAA CCAGCTCTTC GAGGAGAACC CCATCAATGC CTCCGGAGTG  
8881 GACGCCAAAG CCATCTTGTG CGCCCGATTG TCCAAATCCA GACGCTTGGG GAACCTTGATC  
8941 GCACAACCTC CTGGCGAGAA GAAGAACGGC CTCTTCGGCA ACTTGATCGC GCTGTCGCTG  
9001 GGATTGACGC CTAACCTCAA GTCCAACCTC GACTTGGCCG AGGACGCCAA GTTGCAACTG  
9061 TCCAAGGACA CCTACGACGA CGACCTCGAC AACCTGCTGG CCCAAATTGG CGACCAATAC  
9121 GCGGACTTGT TTTTGGCGGC CAAGAACTTG AGCGACGCCA TCTTGTGTAG CGACATCTTG  
9181 CGCGTGAATA CGGAGATCAC CAAAGCCCCT TTGTCCGCCT CTATGATCAA GCGGTACGAC  
9241 GAGCACCCAG AAGACTTGAC CCTGTTGAAA GCCCTCGTGC GGCAACAATT GCCCGAGAAG  
9301 TACAAGGAGA TCTTCTTCGA CCAGTCCAAG AACGGGTACG CCGGCTACAT CGACGGAGGA  
9361 GCCTCCCAAG AAGAGTTCTA CAAGTTTCATC AAGCCCATCC TGGAGAAGAT GGACGGCACC  
9421 GAGGAGTTGC TCGTGAAGCT GAACCGCGAA GACTTGTGTC GAAAACAGCG GACGTTTCGAC  
9481 AATGGCAGCA TCCCCACCA AATCCATTTG GGAGAGTTGC ACGCCATCTT GCGACGGCAA  
9541 GAGGACTTCT ACCCGTTCCT GAAGGACAAC CGCGAGAAAA TCGAGAAGAT CCTGACGTTC  
9601 AGAATCCCCT ACTACGTGGG ACCCTTGGCC CGAGGCAATT CCCGTTTGC ATGGATGACG  
9661 CGCAAAAGCG AAGAGACGAT CACCCCTG GAACTTCGAAG AAGTGGTTCGA CAAAGGAGCA  
9721 TCCGCACAGA GCTTCATCGA GCGAATGACG AACTTCGACA AGAACCTGCC CAACGAGAAG  
9781 GTGTTGGCCA AGCATTTCGCT GCTGTACGAG TACTTACCGG TGACAAACGA GCTGACCAAG  
9841 GTGAAGTACG TGACCGAGGG CATGCGCAAA CCCGCGTTCC TGTCGGGAGA GCAAAAAGAAG  
9901 GCCATTGTGG ACCTGCTGTT CAAGACCAAC CGGAAGGTGA CCGTGAACA GCTGAAAGAG  
9961 GACTACTTCA AGAAGATCGA GTGCTTCGAC TCCGTGGAGA TCTCCGGCGT GGAGGACCGA  
10021 TTCAATGCCT CTTTGGGAAC CTACCATGAC CTCCTGAAGA TCATCAAGGA CAAGGACTTC  
10081 CTGGACAACG AGGAGAACGA GGACATCCTG GAGGACATCG TGCTGACCCT GACCCTGTTC  
10141 GAGGACCGAG AGATGATCGA GGAACGGTTG AAAACGTACG CCCACTTGTG CGACGACAAG  
10201 GTGATGAAGC AGCTGAAACG CCGCCGCTAC ACCGGATGGG GACGATTGAG CCGCAAACCTG  
10261 ATTAATGGAA TTCGCGACAA GCAATCCGGA AAGACCATCC TGGACTTCTT GAAGTCCGAC  
10321 GGGTTCGCCA ACCGCAACTT CATGACGCTC ATCCACGACG ACTCCTTGAC CTTCAAGGAG  
10381 GACATCCAGA AGGCCCAAGT GTCCGGACAA GGAGACTCCT TGCACGAGCA CATCGCCAAT  
10441 TTGGCCGGAT CCCCCGCAAT CAAAAAAGGC ATCTTGCAAA CCGTGAAGT GGTTCGACGAA  
10501 CTGGTGAAGG TGATGGGACG GCACAAGCCC GAGAACATCG TGATCGAAAT GGCCCGCGAG  
10561 AACCAAAACCA CCAAAAAGG ACAGAAGAAC TCCCGAGAGC GCATGAAGCG GATCGAAGAG  
10621 GGCATCAAGG AGTTGGGCTC CCAGATCCTG AAGGAGCATC CCGTGGAGAA TACCCAATTG  
10681 CAAAACGAGA AGCTTACCT CTACTACCTC CAGAACGGGC GGGACATGTA CGTCGACCAA  
10741 GAGCTGGACA TCAACCGCCT CTCCGACTAC GATGTGGATC ATATTGTGCC CCAGAGCTTC  
10801 CTCAAGGACG ACAGCATCGA CAACAAGGTC CTGACCGGCA GCGACAAGAA CCGGGGCAAG  
10861 TCTGACAATG TGCCTTCCGA AGAAGTCGTG AAGAAGATGA AGAACTACTG GCGGCAGCTG  
10921 CTCAACGCCA AGCTCATCAC CCAACGGAAG TTCGACAACC TGACCAAGGC CGAGAGAGGA  
10981 GGATTGTCCG AGTTGGACAA AGCCGCTTC ATTAACGCC AACTCGTGGG GACCCGCCAG

11041 ATCACGAAGC ACGTGGCCCA AATCTTGAC TCCCGGATGA ACACGAAATA CGACGAGAAT  
11101 GACAAGCTGA TCCGCGAGGT GAAGGTGATC ACGCTGAAGT CCAAGCTGGT GAGCGACTTC  
11161 CGGAAGGACT TCCAGTTCTA CAAGGTGCGG GAGATCAACA ACTACCATCA CGCCCATGAC  
11221 GCCTACCTGA ACGCCGTGGT CGGAACCGCC CTGATCAAGA AATACCCCAA GCTGGAGTCC  
11281 GAATTCGTGT ACGGAGATTA CAAGTCTAC GACGTGCGGA AGATGATCGC GAAGTCCGAG  
11341 CAGGAGATCG GCAAAGCCAC CGCCAAGTAC TTCTTTTACT CCAACATCAT GAACTTCTTC  
11401 AAGACCGAGA TCACGCTCGC CAACGGCGAG ATCCGCAAGC GCCCCCTGAT CGAGACCAAC  
11461 GCGGAGACGG GAGAGATTGT GTGGGACAAA GGAAGAGATT TTGCCACAGT GCGCAAGGTG  
11521 CTGTCCATGC CTCAGGTGAA CATCGTGAAG AAGACCGAGG TGCAAACAGG AGGGTTTTTC  
11581 AAAGAGTCCA TTTTGCTTAA GAGGAATTCC GACAAGCTCA TCGCCCGCAA GAAGGACTGG  
11641 GACCCCAAGA AGTACGGGGG CTTCGACTCC CCCACGGTGG CCTACTCCGT GTTGGTGGTG  
11701 GCCAAAGTGG AGAAAGGGAA GAGCAAGAAG CTGAAATCCG TGAAGGAGTT GCTCGGAATC  
11761 ACGATCATGG AACGATCGTC GTTCGAGAAA AACCCCATCG ACTTCTCTGA AGCCAAAGGG  
11821 TACAAAGAGG TGAAGAAGGA CCTGATCATC AAGCTGCCA AGTACTCCCT GTTCGAGCTG  
11881 GAGAACGGCC GCAAGCGGAT GCTGGCCTCC GCCGGGGAAC TGCAGAAAGG GAACGAATTG  
11941 GCCTTGCCCT CCAAATACGT GAACTTCTC TACTTGGCCT CCCATTACGA AAAGCTCAAA  
12001 GGATCCCCTG AGGACAATGA GCAGAAGCAA CTCTTCGTGG AACAACACAA GCACTACCTG  
12061 GACGAGATCA TCGAGCAGAT CAGCGAGTTC TCCAAGCGCG TGATCCTCGC CGACGCCAAC  
12121 CTGGACAAGG TGCTCTCCGC CTACAACAAG CACCGCGACA AGCCTATCCG CGAGCAAGCC  
12181 GAGAATATCA TTCACCTGTT TACCCTGACG AATTTGGGAG CCCCTGCCGC CTTTAAATAC  
12241 TTTGACACCA CCATCGACCG CAAAAGATAC ACCTCCACCA AGGAAGTCTT GGACGCCACC  
12301 CTCATCCACC AGTCCATCAC GGGCTCTAC GAGACGCGCA TCGACCTCTC CCAATTGGGC  
12361 GCGGACTAAA GTGATGCGGC CTTTAGGAAA CACCACAAA GTAATTGACA ATCTCAGGAA  
12421 CGATCTGCGT GTTTACAGCT TCCCAAATAA CAATTATACC ACGTACCAAA AGGGGTTTAA  
12481 TGTATCTCAC AAATCTTCT AATAGGTACA GCTTCTCAA TTGGGTGTAT GATGTGACAC  
12541 TTCGTCTCAC ACACGTCACG ATAATTCAGC GTATGGCTTC CCTTCATCAC ATTCACGCAA  
12601 ACTTCTACAC AACCTGGGC ATATTTCTTG TGTTGGCAAC ACTCCCGAAA TCGATTCTGC  
12661 ACACAATGGT TCATTCAATG ATTCAAGTAC GTTTTAGACG GACTAGGCAG TCTGGTGTGCG  
12721 TCAACAGCCA GCTGCCACAA GAAAGTGAAC ATGCGTCTAT TTATGACGTC ATTCATCAAC  
12781 CACCCCGTTT CCAAACACCG TCCCACGCGC TGTTGAGAGA TGATTTTTTG AATGCCATAT  
12841 GGTGCTCAAA CATGTGCATC GACGCTGTCG CACAAGCAGG AGCGGGCTTG CCCACTCGTT  
12901 CTTGTTAAGC GCTTGATTCA AAATCCCCGC CCGGAACAAA ATATGCCGGA GCGATCCAAC  
12961 GAAGCAAAAG TCAACCAGAG CCTCTCTTTC CGTCCAACAC CCGTGTGGT GCCATGTTAA  
13021 CAATAGATTC ATGCATGGAT AGGCGAAGAC GTGAGAAGTT ACGGAGTTTG GGTGATGCTT  
13081 GCGTACATCA CTCAACCCTT TTCCCAAAA AAAAAATCCG CCATGCGATT GCCTTCGTTG  
13141 CACCGCAAAA CGGAAATTAG TTATGGCGTC ATTGCTCAAG ATTACTGTTT TTCGACAAGG  
13201 TGCTGCACAA CCTTGGAAGA AAACCTGCA AATCCGTCOA TCACATGAGT TGTAGTTTTT  
13261 TTCGGCAAGG CGGGTGAGCG TAGTGAATTA TATTCCTTGT AAGGCAAAGC GGATACTAAT  
13321 TTTACAGTGA TTGCCCTGAC CTCCTATGCT CGGAAACGCC GCCGTAAGC CCCACCCGAA  
13381 CTCAGATCAC CAGTATGCCG AAAAAAGAAAC GCAAGGTGGG GTCCAACCTG TTGACGTTGC  
13441 ATCAGAACTT GCCTGCCTTG CCTGTGGATG CCACATCCGA TGAAGTGCGG AAGAACCCTGA  
13501 TGGACATGTT CCGAGACAGA CAAGCCTTCA GCGAGCACAC CTGGAAGATG CTGCTGTCCG  
13561 TGTGTAGATC TTGGGCAGCA TGGTGAAGC TCAATAACCG GAAGTGGTTC CCAGCCGAAC  
13621 CTGAGGACGT GAGAGACTAC CTGCTGTACC TGCAAGCCAG AGGATTGGCA GTGAAAACCA  
13681 TCCAGCAGCA CTTGGGCCAG CTGAACATGT TGCATCGACG ATCCGGGTTG CCTAGACCTA  
13741 GCGACTCTAA TGCCGTGTCT CTGGTGATGC GCCGAATCAG AAAGGAGAAC GTGGATGCCG  
13801 GAGAACGGGC CAAACAAGCA TTGGCCTTTG AGCGAACCGA CTTGACCAA GTGAGATCCT  
13861 TGATGGAGAA CTCCGACCGG TGCCAAGACA TCCGGAATCT GGCCTTCTTG GGAATCGCCT  
13921 ACAACACGTT GTTGAAGAATA GCCGAGATCG CCCGGATCCG CGTGAAAGAC ATCTCCAGAA  
13981 CAGACGGAGG ACGGATGTTG ATCCATATCG GACGGACGAA GACCCTGGTG TCTACAGCTG  
14041 GAGTGGAAAA GGCCCTGTCC TTGGGAGTGA CGAAATTGGT GGAGCGATGG ATCTCCGTGT  
14101 CTGGAGTGGC CGATGATCCC AACAACCTACC TGTTCTGCAG AGTGCGGAAG AATGGAGTGG  
14161 CAGCCCTAG TGCCACGTCC CAATTGTCCA CAAGAGCCTT AGAGGGAAATC TTCGAAGCCA  
14221 CACATCGCCT GATCTACGGC GCCAAGGACG ATTCCGGACA ACGGTATTTG GCCTGGTCTG  
14281 GACATTCTAG AAGAGTGGGA GCAGCCCGAG ATATGGTAAG TGTTTGCAAG AGGTGCTGCG  
14341 GAGGATGAAG AGGTGCCTGA GAACGATAGA TGGAAAGGTT CGGGTGGCCT TGGTATGGC  
14401 ATTTCTTTCA GAGCTTTCCG AACACAGTCT TGTATCTGCA GTATTAATTG ATGATGACAG  
14461 TGTGTATGAT CCCACCCAGT GCCTTTATGC AGCATGGGAT TGTTAAATAG ATATGAAAGC  
14521 ATAACCGGTA GAAAAGAAAG AGAGATGAGA CGCTTGGTAG AACGCCATA TCTATGCGTT  
14581 ATATGAGGAG ATACAAGCAT AGGCTGTCAC TCAATATGTA AATGGGAGAA GAAGCGTATG

14641 TTACTTGTAG ATCAGGGAGA CGTGTGGATA AAGCGCGCAG CGATTTGTCT TCCCCTCTCC  
14701 GTCTCGATAC CTTTCTGCTC GGTAACAAAC TGACATGGAC TCTATCTTAT ATAAATCACA  
14761 ACGTTTGTAG GCGCGCGCTG GAGTGTCCAT TCCCGAGATC ATGCAAGCTG GAGGATGGAC  
14821 CAACGTGAAC ATCGTGATGA ACTACATCCG GAACCTGGAC TCCGAGACGG GAGCAATGGT  
14881 GCGGCTGTTG GAAGATGGAG ATTAAGGCA GGGTCCCCGC CAAAAAGGGT GGCGAGGACA  
14941 AGAAGAAGAA ACAGGAAGGG GGGGGGCACG ACGGAGGACT TGTCGAGTCC ATCAGGGAGG  
15001 TAGGGGCGGG AAGCCTCGAA TCTGCTAGTT GGTAGGGATA AATAGAGTTC AAGGACCGAA  
15061 GGAGGAGGCG CCAGGATCAG CGAAAGCCTG GATTAAGAGC GAGACTCCTT GCGCTGCAGT  
15121 CAAGGCGATT ACAGGACCCC CGGTGTCTGG GTTTGGAGAT GACCTCTTGG AGGACGGCTT  
15181 GATGCGGGTT TTTGAGGAAG GTTGTACATT TTTGTTTGAA ATTTGCAAGG AAAGCGTCGC  
15241 GCTCCGGCAT AGAGGGATAG GGGGAGGAAA GGGCACTTGT GCCCGCTCCG TCTCTGTACG  
15301 GGTCTTTGAA GAAAAGATTC GAGAAACCAC CCAAAGGGCA TCAAATGCGA AACCTCCTCG  
15361 AAAAAAGTTT CGATTTTCTT TATTTGTTGA GGAGGAGAGG GAAGAGTGGT ATCCAATGTG  
15421 GGGTGATTC ACGCCAACAA AGCGGGGGGA GCTGACCCAG AGGCCACCTG CCACAGGCTC  
15481 CATCCAAACA AGCTTTCAGG GCTGATTCCA GAATTAGGGT TAGAGTAAGA ATGAGGGCTA  
15541 CGCCAGCAGT CATCCTTTGC GGGCGTCTTG AGTCGCAAGA AGCTCTCCA GGAAAGCGAA  
15601 GGCGAATTTT CCCCAAAAC AAAGGCAGTG GCGAGCTCCT TGTCCCTCTT TGAGCACCCC  
15661 TCCTCGCTAA TTTTCTTACT CTGATTTTTT GGGGAAGTGT TTCTCCTTCT TTCGGAGACG  
15721 TGGCCTTATG CTCCATCGCC TTCGCGCACC GACTCGACCA TGCCACACA CTCTCCGTGC  
15781 CCCCCTTCCC TCTGCCACCC TTCCCTCTCC CCCCCTCCCT TCCTCCTCC CTCCCTCCCT  
15841 CCCTCCCTCC CTCCTCCCAG GCACACCCCT ATTGTCCACT TCGCGCCCA GGCTCAATAT  
15901 AGGGCCGTCG TTAAGGATAC TTAATTAATA ACATCTATCC TCCAGATCAC CAGGGCGCGC  
15961 CTATGCTTGT AAACCGTTTT GTGAAAAAAT TTTTAAAATA AAAAAAGGGA CCTCTAGGGT  
16021 CCCCATAATA TTAGTAATAT AATCTATTA AGGTCAATCA AAAGGTATC CAGTCGACCA  
16081 ATTCTCATGT TTGACAGCTT ATCATCGAAT TTCTGCCATT CATCCGCTTA TTATCACTTA  
16141 TTCAGGCGTA GCAACCAGGC GTTTAAGGGC ACCAATAACT GCCTTAAAAA AATTACGCC  
16201 CGCCCTGCCA CTCATCGCAG TACTGTGTGA ATTCATTAAG CATTCTGCCG ACATGGAAGC  
16261 CATCAAAAC GGCATGATGA ACCTGAATCG CCAGCGGCAT CAGCACCTTG TCGCCTTGCG  
16321 TATAATATTT GCCCATGGTG AAAACGGGGG CGAAGAAGTT GTCCATATTG GCCACGTTTA  
16381 AATCAAAAT GGTGAAACTC ACCCAGGGAT TGGCTGAGAC GAAAAACATA TTCTCAATAA  
16441 ACCCTTTAGG GAAATAGGCC AGGTTTTAC CGTAACACGC CACATCTTGC GAATATATGT  
16501 GTAGAAAAC TGCGGAAATCG TCGTGGTATT CACTCCAGAG CGATGAAAAC GTTTCAGTTT  
16561 GCTCATGGAA AACGGTGTA CAAGGGTGAA CACTATCCA TATCACCAGC TCACCCTCTT  
16621 TCATTGCCAT ACGAAATTCC GGATGAGCAT TCATCAGGCG GGCAAGAATG TGAATAAAGG  
16681 CCGGATAAAA CTTGTGCTTA TTTTCTTTA CGGTCCTTAA AAAGGCCGTA ATATCCAGCT  
16741 GAACGGTCTG GTTATAGGTA CATTGAGCAA CTGACTGAAA TGCCTCAAAA TGTTCTTTAC  
16801 GATGCCATTG GGATATATCA ACGGTGGTAT ATCCAGTGAT TTTTTCTCC ATTTTAGCTT  
16861 CCTTAGCTCC TGAAAATCTC GATAACTCAA AAAATACGCC CGGTAGTGAT CTTATTTTCT  
16921 TATGGTGAAA GTTGGAACTC CTTACGTGCC GATCAACGCT TCATTTTCGC CAAAAGTTGG  
16981 CCGGGGCTA CCGGTATCA ACAGGACAC CAGGATTTAT TTATTCTGCG AAGTGATCTT  
17041 CCGTACAGG TATTTATTCG CGATAAGCTC ATGGAGCGGC GTAACCGTCG CACAGGAAGG  
17101 ACAGAGAAAG CGCGGATCTG GGAAGTGACG GACAGAACGG TCAGGACCTG GATTGGGGAG  
17161 GCGGTTGCCG CCGCTGCTGC TGACGGTGTG ACGTTCTCTG TTCCGGTCAC ACCACATACG  
17221 TTCCGCCATT CCTATGCGAT GCACATGCTG TATGCCGTA TACCGTGAA AGTTCTGCAA  
17281 AGCCTGATGG GACATAAGTC CATCAGTTCA ACGGAAGTCT ACACGAAGGT TTTTGCCTG  
17341 GATGTGGCTG CCCGGCACCG GGTGCAGTTT GCGATGCCGG AGTCTGATGC GGTTGCGATG  
17401 CTGAAACAAT TATCCTGAGA ATAAATGCCT TGGCCTTTAT ATGGAATGT GGAAGTGTG  
17461 GGATATGCTG TTTTGTCTG TTAACAGAG AAGCTGGCTG TTATCCACTG AGAAGCGAAC  
17521 GAAACAGTCG GGAAAATCTC CCATTATCGT AGAGATCCGC ATTATTAATC TCAGGAGCCT  
17581 GTGTAGCGTT TATAGGAAGT AGTGTCTGT CATGATGCCT GCAAGCGGTA ACGAAAACGA  
17641 TTTGAATATG CCTTCAGGAA CAATAGAAAT CTTCTGCGG TGTTACGTTG AAGTGGAGCG  
17701 GATTATGTCA GCAATGGACA GAACAACCTA ATGAACACAG AACCATGATG TGGTCTGTCC  
17761 TTTTACAGCC AGTAGTGCTC GCCGCAGTCG AGCGACAGGG CGAAGCCCTC GAGCTGGTTG  
17821 CCCTCGCCG TGGGCTGGCG GCCGTCTATG GCCCTGCAAA CGCGCCAGAA ACGCCGTCTGA  
17881 AGCCGTGCTG GAGACACCGC GGCCGGCCGC CGGCGTTGTG GATACCTCGC GGAAAACCTG  
17941 GCCCTACTG ACAGATGAGG GCGGACGTT GACACTTGAG GGGCCGACTC ACCCGCCGCG  
18001 CGGTTGACAG ATGAGGGGCA GGCTCGATTT CGGCCGCGA CGTGGAGCTG GCCAGCCTCG  
18061 CAAATCGGCG AAAACGCCTG ATTTTACGCG AGTTTCCAC AGATGATGTG GACAAGCCTG  
18121 GGGATAAGTG CCCTGCGGTA TTGACACTTG AGGGGCGCGA CTAAGTACAG ATGAGGGGCG  
18181 CGATCCTTGA CACTTGAGGG GCAGAGTGCT GACAGATGAG GGGCGCACCT ATTGACATTT

```

18241 GAGGGGCTGT CCACAGGCAG AAAATCCAGC ATTTGCAAGG GTTCCGCC CCCTTCGCGC
18301 CACCGCTAAC CTGTCTTTTA ACCTGCTTTT AAACCAATAT TTATAAACCT TGTTTTTAAC
18361 CAGGCTGCGC CCCTGTGCGC GTGACCGCGC ACGCCGAAGG GGGGTGCCCC CCCTTCGCGA
18421 ACCCTCCCGG TCGAGTGAGC GAGGAAGCAC CAGGGAACAG CACTTATATA TTCTGCTTAC
18481 ACACGATGCC TGAAAAAACT TCCCTTGGGG TTATCCACTT ATCCACGGGG ATATTTTTAT
18541 AATTATTTTT TTTATAGTTT TTAGATCTTC TTTTTAGAG CGCCTGTAG GCCTTTATCC
18601 ATGCTGGTTC TAGAGAAGGT GTTGTGACAA ATTGCCCTTT CAGTGTGACA AATCACCCCTC
18661 AAATGACAGT CCTGTCTGTG ACAAATTGCC CTTAACCCCTG TGACAAATTG CCCTCAGAAG
18721 AAGCTGTTTT TTCACAAAGT TATCCCTGCT TATTGACTCT TTTTTATTTA GTGTGACAAT
18781 CTA AAAACTT GTCACACTTC ACATGGATCT GTCATGGCGG AAACAGCGGT TATCAATCAC
18841 AAGAAACGTA AAAATAGCCC GCGAATCGTC CAGTCAAACG ACCTCACTGA GGCGGCATAT
18901 AGTCTCTCCC GGGATCAAAA ACGTATGCTG TATCTGTTCC TTAGCCAGAT CAGAAAATCT
18961 GATGGCACCC TACAGGAACA TGACGGTATC TGCGAGATCC ATGTTGCTAA ATATGCTGAA
19021 ATATTCGGAT TGACCTCTGC GGAAGCCAGT AAGGATATAC GGCAGGCATT GAAGAGTTTC
19081 GCGGGGAAGG AAGTGGTTTT TTATCGCCCT GAAGAGGATG CCGGCATGA AAAAGGCTAT
19141 GAATCTTTTC CTTGGTTTAT CAAACGTGCG CACAGTCCAT CCAGAGGGCT TTACAGTGTA
19201 CATATCAACC CATATCTCAT TCCCTTCTTT ATCGGGTTAC AGAACCGGT TACGCAGTTT
19261 CGGCTTAGTG AAACAAAAGA AATCACCAAT CCGTATGCCA TGCGTTTATA CGAATCCCTG
19321 TGTCAGTATC GTAAGCCGGA TGGCTCAGGC ATCGTCTCTC TGAAAATCGA CTGGATCATA
19381 GAGCGTTACC AGCTGCCTCA AAGTTACCAG CGTATGCCTG ACTTCCGCCG CCGCTTCTG
19441 CAGGTCTGTG TTAATGAGAT CAACAGCAGA ACTCCAATGC GCCTCTCATA CATTGAGAAA
19501 AAGAAAGGCC GCCAGACGAC TCATATCGTA TTTTCCTTCC GCGATATCAC TTCCATGACG
19561 ACAGATAGT CTGAGGGTTA TCTGTACAG ATTTGAGGGT GGTTCGTCAC ATTTGTCTG
19621 ACCTACTGAG GGTAATTTGT CACAGTTTTG CTGTTTCCTT CAGCCTGCAT GGATTTTCTC
19681 ATACTTTTTG AACTGTAATT TTTAAGGAAG CCAAATTTGA GGGCAGTTTG TCACAGTTGA
19741 TTTCTTCTC TTTCCCTTCG TCATGTGACC TGATATCGGG GGTAGTTTCG TCATCATTGA
19801 TGAGGGTTGA TTATCACAGT TTATTACTCT GAATTGGCTA TCCGCGTGTG TACCTTACC
19861 TGGAGTTTTT CCCACGGTGG ATATTTCTTC TTGCGCTGAG CGTAAGAGCT ATCTGACAGA
19921 ACAGTTCTTC TTTGCTTCCT CGCCAGTTCC CTCGCTATGC TCGGTTACAC GGCTGCGGCG
19981 AGCATCACGT GCTATAAAAA TAATTATAAT TTAATTTTTT TAATATAAAT ATATAAATTA
20041 AAAATAGAAA GTAAAAAAG AAATTAAGA AAAAATAGTT TTTGTTTTCC GAAGATGTAA
20101 AAGACTCTAG GGGGATCGCC AACAATAACT ACCTTTTATC TTGCTCTTCC TGCTCTCAGG
20161 TATTAATGCC GAATTGTTTC ATCTTGCTG TGTAGAAGAC CACACACGAA AATCCTGTGA
20221 TTTTACATTT TACTTATCGT TAATCGAATG TATATCTATT TAATCTGCTT TTCTTGCTA
20281 ATAAATATAT ATGTAAGTA CGCTTTTTGT TGAAATTTTT TAAACCTTTG TTTATTTTTT
20341 TTTCTTCATT CCGTAACTCT TCTACCTTCT TTATTTACTT TCTAAAATCC AAATACAAAA
20401 CATAAAAATA AATAAACACA GAGTAAATTC CCAAATTTAT CCATCATTA AAGATACGAG
20461 GCGCGTGTA GTTACAGGCA AGCGATCCTA GTACACTCTA TATTTTTTTA TGCTCGGTA
20521 ATGATTTTCA TTTTTTTTTT TCCACCTAGC GGATGACTCT TTTTTTTTCT TAGCGATTGG
20581 CATTATCACA TAATGAATTA TACATTATAT AAAGTAATGT GATTTCTTCG AAGAATATAC
20641 TAAAAATGA GCAGCAAGA TAAACGAAGG CAAAGATGAC AGAGCAGAAA GCCCTAGTAA
20701 AGCGTATTAC AAATGAAACC AAGATTGAGA TTGCGATCTC TTTAAAGGGT GGTCCCCTAG
20761 CGATAGAGCA CTCGATCTTC CCAGAAAAAG AGGCAGAAGC AGTAGCAGAA CAGGCCACAC
20821 AATGCAAGT GATTAACGTC CACACAGGTA TAGGGTTTCT GGACCATATG ATACATGCTC
20881 TGGCCAAGCA TTCCGGCTGG TCGTAATCG TTGAGTGCAT TGGTGACTTA CACATAGACG
20941 ACCATCACAC CACTGAAGAC TGCGGGATTG CTCTCGGTCA AGCTTTTAAA GAGGCCCTAC
21001 TGGCGCGTGG AGTAAAAAGG TTTGGATCAG GATTTGCGCC TTTGGATGAG GCACTTTCCA
21061 GAGCGGTGGT AGATCTTTCG AACAGGCCGT ACGCAGTTGT CGAACTTGGT TTGCAAAGGG
21121 AGAAAGTAGG AGATCTCTCT TGCGAGATGA TCCCGCATTT TCTTGAAGC TTTGCAGAGG
21181 CTAGCAGAAT TACCCTCCAC GTTGATTGTC TGCGAGGCAA GAATGATCAT CACCGTAGTG
21241 AGAGTGC GTT CAAGGCTCTT GCGGTTGCCA TAAGAGAAGC CACCTCGCCC AATGGTACCA
21301 ACGATGTTCC CTCCACCAA GGTGTCTTA TGTAGTTTTA CACAGGAGTC TGGACTTGAC

```

//

**.GB formatted Sequence for loxP-BSD-GFP-loxP fragment**

LOCUS loxP-BSD-GFP-loxP 3711 bp DNA linear UNA 9-APR-2015  
 DEFINITION Complementary copy of pUC19.  
 KEYWORDS ATCC.  
 COMMENT This file is created by Vector NTI  
<http://www.invitrogen.com/>

FEATURES Location/Qualifiers  
 misc\_feature 16..41  
 /vntifkey="21"  
 /label=3frameStopFiller1  
 /label="3 frame stops"  
 misc\_feature 50..83  
 /feature\_type="lox sites"  
 /vntifkey="21"  
 /label=loxP  
 terminator complement(117..434)  
 /vntifkey="43"  
 /label=EIF3\_Term  
 /label=EIF3\_T  
 CDS complement(435..833)  
 /vntifkey="4"  
 /label=BSD-ORF  
 /label=BSD  
 promoter complement(855..1856)  
 /vntifkey="21"  
 /label="TCT\_Pro (Sequence corrected)"  
 /label=TCT\_P  
 terminator complement(1870..2069)  
 /vntifkey="43"  
 /label=Term5  
 /label=GNPDA\_T  
 CDS complement(2070..2771)  
 /vntifkey="4"  
 /label=GFP  
 promoter complement(2772..3593)  
 /vntifkey="21"  
 /label="Promoter 4AIII sequence corrected"  
 /label=4AIII\_P  
 misc\_feature 3627..3660  
 /feature\_type="lox sites"  
 /vntifkey="21"  
 /label=loxP  
 misc\_feature complement(3669..3690)  
 /vntifkey="21"  
 /label=3frameStopFiller2rc  
 /label="3 frame stops"

## ORIGIN

```

1 TCCACAGCCC GAACCCCTTA AGCTAGACGA ACACAGTTAG CGCGGCCGCA TAACTTCGTA
61 TAGCATACAT TATACGAAGT TATGATGCTA GCGTGTTTAA GAAGTCACTT AATTAACGTA
121 TGGTCGACGG TTGCTCGGAT GGGGGGGGCG GGGAGCGATG GAGGGAGGAA GATCAGGTAA
181 GGTCTCGACA GACTAGAGAA GCACGAGTGC AGGTATAAGA AACAGCAAAA AAAAGTAATG
241 GGCCAGGCC TGGAGAGGGT ATTTGTCTTG TTTTCTTTG GCCAGGAACT TGTTCTCCTT
301 TCTTCGTTTC TAGGACCCCG ATCCCGCTC GCATTTCTCT CTTCCCTCAGC CGAAGCGCAG
361 CGGTAAAGCA TCCATTTTAT CCCACCGAAA GGGCGCTCCC AGCCTTCGTC GAGCGGAACC
421 GGGGTTACAG TGCCTCAACC CTCCCAGACG TAGCCAGAGG GAAGCAACTC CCTGATGCCA
481 ACCGCTGTGG GCTGCCCATC GGAATCTTTG ACAATTGCCT TGATCCCCGG GTGCAAGTCA
541 AGCAGCACCT GCCGACATCG CCCGCACGGA GACAGAATGC CGCGGTTTTC GTTCCCAGTG
601 GCCACTATGC ACGTCAGATT TCCGGCAGCA GCCGCAGCGG CCGTTCCGAG GACCACGAGC
661 TCCGCGCATG GCCCTCCGGT GAAATGATAT ACATTCACGC CGGTAAGAT CCGACCGTCG
721 GACGAGAGGG CTGCACTGGC CACCGAGTAG TCCTCGCTAA TAGGTATGCT GTTGATGGTC
781 GCAGTTGCAC GTTCGATCAG CGTGGATTCC TCTTGGGATA AAGGCTTGGC CATCGAGCTC

```



```

841 GGTACCCGGG GATCCATGAT TGTTGTATTA TGTACCTATG TTTGTGATGA GACAATAAAT
901 ATGAGAAGAG AACGTTGCGG CCACTTTTTT CTCCTTCCTT CGCGTGCTCA TGTTGGTGGT
961 TTGGGAGGCA GAAGATGCAT GGAGCGCCAC ACATTCGGTA GGACGAAACA GCCTCCCCCA
1021 CAAAGGGACC ATGGGTAGCT AGGATGACGC ACAAGCGAGT TCCCCTCTC GAAGGGAAAC
1081 CCAGGCATTT CCTTCTCTT TTCAAGCCAC TTGTTACGT GTCAACACAA TTTTGGACTA
1141 AAATGCCCTG CGGAACCTCG CAGGCCTCCC TCTGCTCCGT TGTCTGGTC GCCGAGAACG
1201 CGAGACCGTG CCGCATGCCA TCGATCTGCT CGTCTGTACT ACTAATCGTG TCGGTGTTCTG
1261 TGCTTGTTTC GCACGAAATT GTCCTCGTTC GGCCCTCACA ACGGTGGAAA TCGGTGCTAG
1321 AATAAAGTGA GGTGGCTTAT TTCAATGGCG GCCGTCATCA TCGGGGATCA ACTGAAGTAC
1381 GCGGGTCTT CGAGATTTCA TCGTGTCTGT CCAGAGCAGG TGTTTTGCCT GCAGCTCTTC
1441 ATGTTTAGGG GTCATGATTT CATCTGATAT GCCGTAAGAA AACCAATATT CACTTCTCAA
1501 TTTTCCATGG AAAGGTGAAG GCCTAGGTTG TGTGCGAGGC AACGACTGGG GAGGGATCGC
1561 AACATTCTTG CTAACCTCCC CTCTATCTTG GCCGCTGTGA ATCGGCATAT TTACCGGGCT
1621 GAATTGAGAA AGTGTTTTGA GGGAAATAAA AGGTGGCTGT CTTGCAAGCT TGGCTTCAGT
1681 GCCTGCTTAA TTCGAACCGA TCCAGCTTGT GATGAGGCCT TCCTAAGCCT GGTAGTCAGA
1741 AGCGACATGG CGCTATAAAT TTCGTCTCAG TTGGAGAGTA GAAAAGCATG ATTCGAACAC
1801 GGTTTTCAAC TGCCAAAGAT ATCTCCATTG TTTCTTCAA TCTGTACACC TGCACGGGCC
1861 AGTGAGGCCA GGAATAAAG ATGGACAGAC GGCATGCTAG TAGACTTTGT TGAGATTAGT
1921 GTTTGTGTTC GTCTTTATGG CTTTGAGTGG GCCCCCTTAA CCTATACACA CATGACAATC
1981 AGGTGACGAG GAAGCTCTCG ACTCTCCAGG TCTCCAACAC ATCATGAGGA CGCCGCTCTG
2041 CCAGGACCCT CCCCAGCTCC TTCCCACCCT TATTCTTAC CGGCATCTGC ATCCGGGGTC
2101 TTGAAGGCGT GCTGGTACTC CACGATGCCC AGCTCGGTGT TGCTGTGATC CTCCTCCACG
2161 CGGCGGAAGG CGAACATGGG GCCCCGTTT TGCAGGATGC TGGGGTGGAT GCGGCTTTG
2221 AAGTGCATGT GCGTGTCCAC CACGGAGCTG TAGTAGCCGC CGTCGCGCAG GCTGAAGGTG
2281 CGGGTGAAGC TGCCATCCAG ATCGTTATCG CCCATGGGGT GCAGGTGCTC CACGGTGGCG
2341 TTGCTGCGGA TGATCTTGTG GGTGAAGATC ACGCTGTCTT CGGGGAAGCC GGTGCCATC
2401 ACCTTGAAGT CGCCGATCAC GCGGCCGGCC TCGTAGCGGT AGCTGAAGCT CACGTGCAGC
2461 ACGCCGCCGT CCTCGTACTT CTCGATGCGG GTGTTGGTGT AGCCCGCCTT GTTGATGGCG
2521 TGCAGGAAGG GGTTCTCGTA GCCGCTGGGG TAGGTGCCGA AGTGGTAGAA GCCGTAGCCC
2581 ATCACGTGGC TCAGCAGGTA GGGGTGAAG GTCAGGGCGC CTTTGGTGCT CTTTCTTTG
2641 TTGGTCATGC GGCCCTGCTC GGGGGTGCCC TCTCCGCCGC CCACCAGCTC GAACTCCACG
2701 CCGTTCAGGG TGCCGGTGAT GCGGCACTCG ATCTCCATGG CGGGCAGGCC GCTCTCGTCG
2761 CTCTCCAACA TGTAAGCTAG GCTTTTGGTG AGAGAATGGG AAAGAAGTTA GATGTAATAA
2821 TGAATTCGG TTGTGCAATT TCAGAGGTAG TGC CGCGTGC GTGCGCAACG AAGGACCGTC
2881 TGCACAGATC GGAGAGAATT GGGGTAGCCA CTAGAGTAGA AAACCTTAC TTTCCCGCCT
2941 GAGCACCGTT TCTGGAAAGG ATCTGAAGAT TGAGATATGA TTTTTCGAAC TTGCACCGAT
3001 GTGGCCCTCG TGTAGAAGAC GAGGCAGAGT GGATATAGTG CCACTGAAGA CATGCAGCAA
3061 GCTACCGAAC AACGCGATAA TGGAGACTAG CGCGTCTGCC ATTGGCAACC GTGCTCGCCT
3121 TCTCGTGATC TTACGTGTCG CGTCTCTTCA TCTCCGTACA CGAAAAATAT TGGTATGCGC
3181 GTGCATTATG CTTTCAGTAC GTGTAATGA GAGACAGGCA ATGCCACACT ACTGGCCGAG
3241 GACATGTTAT CCTCATCCGG GTCGCTTTTC TTGCTCTATG CAAGGAAAGG GCGGAAATG
3301 ATAGAGATTG ATAAATTGAT CGACGCGGAA GAGTTATTAC TCTGCATGAC AATGAAGTGT
3361 GCTTTTAAAG TTTTGTTTAT CGAGAGGCCT CGTGCAGAGG ATTTTTGTCT CAGCATGATT
3421 GACTTGATAG ATAGATACTA GCTGGACTGG TCTTGCACAT CCCTACACCT CCTGCCAAC
3481 GGAAAAAAGG AGCATCTGTC GGCTGCACAC AGATTGCGAC TACTTATAAC TTCAAACAT
3541 GCTATAAGTG TCCTTTTCTT TCTTTCTTTT CTTTCTTTCG CGTCCTTTAT GCCCCTGCAG
3601 GGTACGTTTT AGACGGACTA GGCAGTATAA CTTCTGATAG CATACTTAT ACGAAGTTAT
3661 GGC GCGCCAG GCTACGTTAG TTCAGCAGCT GAGAACGACC ACGAACGGGA A

```

//

**.GB formatted Sequence for loxN-HYGR-GFP-loxN fragment**

```

LOCUS      loxN-HYGR-GFP-loxN      4341 bp      DNA      linear      UNA 26-FEB-2015
DEFINITION Complementary copy of pUC19.
KEYWORDS   ATCC.
COMMENT    This file is created by Vector NTI
           http://www.invitrogen.com/
FEATURES   Location/Qualifiers
           misc_feature      16..41
           /vntifkey="21"

```

```

        /label=3frameStopFiller1
        /label="3 frame stops"
misc_feature 50..83
        /feature_type="lox sites"
        /vntifkey="21"
        /label=loxN
terminator complement(117..434)
        /vntifkey="43"
        /label=EIF3_Term
        /label=EIF3_T
CDS complement(435..1463)
        /vntifkey="4"
        /label=Hygro
        /label=HygR
promoter complement(1485..2486)
        /vntifkey="21"
        /label="TCT_Pro (Sequence corrected)"
        /label=TCT_P
terminator complement(2500..2699)
        /vntifkey="43"
        /label=Term5
        /label=GNPDA_T
CDS complement(2700..3401)
        /vntifkey="4"
        /label=GFP
promoter complement(3402..4223)
        /vntifkey="21"
        /label="Promoter 4AIII sequence corrected"
        /label=4AIII_P
misc_feature 4257..4290
        /feature_type="lox sites"
        /vntifkey="21"
        /label=loxN
misc_feature complement(4299..4320)
        /vntifkey="21"
        /label=3frameStopFiller2rc
        /label="3 frame stops"
ORIGIN
  1 TCCACAGCCC GAACCCCTTA AGCTAGACGA ACACAGTTAG CGCGGCCGCA TAACCTCGTA
  61 TAGTATACCT TATACGAAGT TATGATGCTA GCGTGTTTAA GAAGTCACTT AATTAACGTA
 121 TGGTCGACGG TTGCTCGGAT GGGGGGGGCG GGGAGCGATG GAGGGAGGAA GATCAGGTAA
 181 GGTCTCGACA GACTAGAGAA GCACGAGTGC AGGTATAAGA AACAGCAAAA AAAAGTAATG
 241 GGCCAGGCC TGGAGAGGGT ATTTGTCTTG TTTTCTTTG GCCAGGAACT TGTTCTCCTT
 301 TCTTCGTTTC TAGGACCCCG ATCCCCGCTC GCATTTCTCT CTTCCCTCAGC CGAAGCGCAG
 361 CGGTAAAGCA TCCATTTTAT CCCACCGAAA GGGCGCTCCC AGCCTTCGTC GAGCGGAACC
 421 GGGGTTACAG TGCCTCACTC CTTTGACGCG GGTCGGGTGC TCGGCCTACG GTTGCCCGAG
 481 TCCGCAAGCA CCTCAACACA GCCGTCTGTC CACACCGCAG CCGACCGGCG TGCGATTTGG
 541 GTCCGACCCA CCGTCCCAGC CCCGCTGCGG ACTATCGCGT CGCAGCGGCC CTGCGCCAC
 601 GCGGCGTCGT CGAAGTTGCC GTCGACGAGA GACTGGTAAA GCTGATCGAG TCCGATACGC
 661 AACATATAGG CGCGGAGTCG TGGGGAGCCG GCCAGCTCCG GGTGCCTCCG TTCAAAGTAG
 721 CGTGTCTGCT GCTCCATGCA CGCCAACCAG GGACGCCAGA AGAATATGTT CGCCACTTCG
 781 TATTGGCTAT CACCAAACAT CGCTTCGGAC CAGTCGATGA CAGCAGTAAT CCGACCATTG
 841 TCTGTAAGTA CGTTATTGCT GCCGAAATCC GCGTGACCA GGTGCCTGAC CTCAGGGCAA
 901 TCCTCGGCC ACAACATGAG TTCGTCCAGT GCTTGGGCCA CGGATGCAGA CACGGTGTCA
 961 TCCATGACTG TCTGCCAATG ATAGACGTGA GGATCGGCAA TGGCGCAGAT GAAGTCTCGC
1021 CAGGTCGTGT ACTGCCGAT GCCCTGGGGC CAAAAGGTC CAAAGCCGGA CGTCTGAGAC
1081 AGATCTGCGG CAGCGATCGC GTCCATGGCC TCGGCCACGG GTTGCAAAC GGCAGGCAAT
1141 TCAGTTTCGG GCAGATCTTG CAACGTCACT CCCTGGGCTC GGC GCGAGAT GCAGTACGTG
1201 AGAGATTCGC TAAACTCCCC AATGTCCAGT ACCTCTGGTA TGGGGAGAGC GCGGAGGCG
1261 AAATGACGGT AGACATACCG ATCCTTGTAG AACCCGTCCG CACAAC TATT AACCTCAAC

```

```

1321 ACGTATCCCC GACCCCCTAC GTCAAACGAG AACGCCCTAC TCTCCTCTCC CTCGCTCAGT
1381 TGCATCAAGT CGGAGACAGA GTCGAACTTC TCAATAAGGA ATTTCTCCAC GGACGTAGCG
1441 GTCAGTTCGG GTTTCTTCCC CATCGAGCTC GGTACCCGGG GATCCATGAT TGTTGTATTA
1501 TGTACCTATG TTTGTGATGA GACAATAAAT ATGAGAAGAG AACGTTGCGG CCACTTTTTT
1561 CTCCTTCCTT CGCGTGCTCA TGTTGGTGGT TTGGGAGGCA GAAGATGCAT GGAGCGCCAC
1621 ACATTTCGTA GGACGAAACA GCCTCCCCCA CAAAGGGACC ATGGGTAGCT AGGATGACGC
1681 ACAAGCGAGT TCCCGCTCTC GAAGGGAAAC CCAGGCATTT CCTTCTCTT TTCAAGCCAC
1741 TTGTTACAGT GTCAACACAA TTTTGGACTA AAATGCCCTT CGGAACTCGG CAGGCCCTCC
1801 TCTGCTCCGT TGTCCTGGTC GCCGAGAACG CGAGACCGTG CCGCATGCCA TCGATCTGCT
1861 CGTCTGTAAT ACTAATCGTG TCGTGTTTCG TGCTTGTTTC GCACGAAATT GTCCTCGTTC
1921 GGCCCTCACA ACGGTGGAAA TCGGTGCTAG AATAAAGTGA GGTGGCTTAT TTCAATGGCG
1981 GCCGTCATCA TGCGGGATCA ACTGAAGTAC GGCGGGTTCT CGAGATTTC A TCGTGCTCGT
2041 CCAGAGCAGG TGTTTTGCCT GCAGCTCTTC ATGTTTAGGG GTCATGATTT CATCTGATAT
2101 GCCGTAAGAA AACCAATATT CACTTCTCAA TTTTCCATGG AAAGGTGAAG GCCTAGGTTG
2161 TGTGCGAGGC AACGACTGGG GAGGGATCGC AACATTCTTG CTAACCTCCC CTCTATCTTG
2221 GCCGCTGTGA ATCGGCATAT TTACCGGGCT GAATTGAGAA AGTGTTTTGA GGGAAATAAA
2281 AGGTGGCTGT CTTGCAAGCT TGGCTTCAGT GCCTGCTTAA TTCGAACCGA TCCAGCTTGT
2341 GATGAGGCC TCCTAAGCCT GGTAGTCAGA AGCGACATGG CGCTATAAAT TTCGTCTCAG
2401 TTGGAGAGTA GAAAAGCATG ATTCGAACAC GGTTCCTAAC TGCCAAAGAT ATCTCCATTG
2461 TTTCTTCAA TCTGTACACC TGCACGGGCC AGTGAGGCCA GGAAATAAAG ATGGACAGAC
2521 GGCATGCTAG TAGACTTTGT TGAGATTAGT GTTTGTGTTT GTCTTTATGG CTTTGAGTGG
2581 GCCCCTTAA CCTATACACA CATGACAATC AGGTGACGAG GAAGCTCTCG ACTCTCCAGG
2641 TCTCCAACAC ATCATGAGGA CGCCGCTCTG CCAGGACCTT CCCCAGCTCC TTCCCACCT
2701 TATTCTTAC CGGCATCTGC ATCCGGGGTC TTGAAGGCGT GCTGGTACTC CACGATGCCC
2761 AGCTCGGTGT TGCTGTGATC CTCCTCCACG CGGCGGAAGG CGAACATGGG GCCCCCGTTC
2821 TGCAGGATGC TGGGGTGGAT GGCCTCTTGG AAGTGCATGT GGCTGTCCAC CACGGAGCTG
2881 TAGTAGCCGC CGTCGCGCAG GCTGAAGGTG CGGGTGAAGC TGCCATCCAG ATCGTTATCG
2941 CCCATGGGGT GCAGGTGCTC CACGGTGGCG TTGCTGCGGA TGATCTTGTC GGTGAAGATC
3001 ACGCTGTCCT CGGGGAAGCC GGTGCCCATC ACCTTGAAGT CGCCGATCAC GCGGCCGGCC
3061 TCGTAGCGGT AGCTGAAGCT CACGTGCAGC ACGCCGCCGT CCTCGTACTT CTCGATGCGG
3121 GTGTTGGTGT AGCCGCCGTT GTTGATGGCG TGCAGGAAGG GGTTCCTCGTA GCCCGTGGG
3181 TAGGTGCCGA AGTGGTAGAA GCCGTAGCCC ATCACGTGGC TCAGCAGGTA GGGGCTGAAG
3241 GTCAGGGCGC CTTTGGTGCT CTTTCTTTG TTGGTCATGC GGCCCTGCTC GGGGGTGCCC
3301 TCTCCGCCGC CCACCAGCTC GAACTCCACG CCGTTCAGGG TGCCGGTGAT GCGGCACTCG
3361 ATCTCCATGG CGGGCAGGCC GCTCTCGTGC CTCTCCAACA TGTAAGCTAG GCTTTTGGTG
3421 AGAGAATGGG AAAGAAGTTA GATGTAAAAT TGAACCTCGG TTGTCGAATT TCAGAGGTAG
3481 TGCGCGGTGC GTGCGCAACG AAGGACCGTC TGCGACAGTC GGAGAGAATT GGGGTAGCCA
3541 CTAGAGTAGA AAACCTTAC TTTCCCGCCT GAGCACCGTT TCTGGAAAGG ATCTGAAGAT
3601 TGAGATATGA TTTTTCGAAC TTGCACCGAT GTGGCCCTCG TGTAGAAGAC GAGGCAGAGT
3661 GGATATAGTG CCACCTGAAGA CATGCAGCAA GCTACCGAAC AACCGGATAA TGGAGACTAG
3721 CGCGTCTGCC ATTTGGCAACC GTGCTCGCCT TCTCGTGATC TTACGTGTCG CGTCTCTTCA
3781 TCTCCGTACA CGAAAAATAT TGGTATGCGC GTGCATTATG CTTTCAGTAC GTGTAATGA
3841 GAGACAGGCA ATGCCACACT ACTGGCGCAG GACATGTTAT CCTCATCCGG GTCGCTTTTC
3901 TTGCTCTATG CAAGGAAAGG GGCGGAAATG ATAGAGATTG ATAAATTGAT CGACCGGGAA
3961 GAGTTATTAC TCTGCATGAC AATGAAGTGT GCTTTTAAAG TTTTGTATTAT CGAGAGGCCT
4021 CGTGCGAGAA ATTTTTGTCT CAGCATGATT GACTTGTAGG ATAGATACTA GCTGGACTGG
4081 TCTTCGACAT CCCTACACCT CCTGCCAAAC GGAAAAAAA AGCATCTGTC GGCTGCACAC
4141 AGATTGCGAC TACTTATAAC TTCAAACCTAT GCTATAAGTG TCCTTTTCTT TCTTTCTTTT
4201 CTTTCTTTCG CGTCCCTTAT GCCCTGCGAG GGTACGTTTT AGACGGACTA GGCAGTATAA
4261 CTTCTGTATG TATACCTTAT ACGAAGTTAT GGCGCGCCAG GCTACGTTAG TTCAGCAGCT
4321 GAGAACGACC ACGAACGGGA A

```

//

**.GB formatted Sequence for lox2272-BLE-GFP-lox2272 fragment**

```

LOCUS      lox2272-BLE-GFP-lox2272      4029 bp      DNA      linear      UNA 24-JUL-2017
DEFINITION Complementary copy of pUC19.

```

KEYWORDS ATCC.  
COMMENT This file is created by Vector NTI  
<http://www.invitrogen.com/>

FEATURES Location/Qualifiers  
misc\_feature 253..286  
/feature\_type="lox sites"  
/vntifkey="21"  
/label=lox2272  
terminator complement(287..604)  
/vntifkey="43"  
/label=EIF3\_Term  
/label=EIF3\_T  
CDS complement(605..979)  
/vntifkey="4"  
/label=bleR  
/label=BLE  
promoter complement(1001..2002)  
/vntifkey="21"  
/label="TCT\_Pro (Sequence corrected)"  
/label=TCT\_P  
terminator complement(2016..2215)  
/vntifkey="43"  
/label=Term5  
/label=GNPDA\_T  
CDS complement(2216..2917)  
/vntifkey="4"  
/label=GFP  
promoter complement(2918..3739)  
/vntifkey="21"  
/label="Promoter 4AIII sequence corrected"  
/label=4AIII\_P  
misc\_feature 3740..3773  
/feature\_type="lox sites"  
/vntifkey="21"  
/label=lox2272

## ORIGIN

```

1 GCCACCTCTG ACTTGAGCGT CGATTTTTGT GATGCTCGTC AGGGGGGCGG AGCCTATGGA
61 AAAACGCCAC CAACGCGGCC TTTTACGGT TCCTGGCCTT TTGCTGGCCT TTTGCTCACA
121 TGTTCTTTCC TGC GTTATCC CTGATTCTG TGGATAACCC TATTACCGCC TTTGAGTGAG
181 CTGATACCGC TCGCCGCAGC CGAACGACCG AGCGCAGCGA GTCAGTGAGC GAGGAAGCGG
241 AAGAGCGGCC GCATAACTTC GTATAGGATA CTTTATACGA AGTTATCGTA TGGTCGACGG
301 TTGCTCGGAT GGGGGGGGCG GGGAGCGATG GAGGGAGGAA GATCAGGTAA GGTCTCGACA
361 GACTAGAGAA GCACGAGTGC AGGTATAAGA AACAGCAAAA AAAAGTAATG GGCCAGGCC
421 TGGAGAGGGT ATTTGTCTTG TTTTCTTTG GCCAGGAACT TGTTCTCCTT TCTTCTTTT
481 TAGGACCCCG ATCCCCGCTC GCATTCTCTT CTTCTCAGC CGAAGCGCAG CGGTAAAGCA
541 TCCATTTTAT CCCACCGAAA GGGCGCTCCC AGCCTTCGTC GAGCGGAACC GGGGTTACAG
601 TGCCTTAGTC CTGCTCCTCG GCCACGAAGT GCACGCAGTT GCCGGCCGGG TCGCGCAGGG
661 CGAACTCCCG CCCCACGGC TGCTCGCCGA TCTCGTTCAT GGCCGGCCCG GAGGCGTCCC
721 GGAAGTTCGT GGACACGACC TCCGACCACT CGGCGTACAG CTCGTCCAGG CCGCGCACCC
781 ACACCCAGGC CAGGGTGTG TCCGGCACCA CCTGGTCTG GACCGCGCTG ATGAACAGGG
841 TCACGTGCTC CCGGACCACA CCGGCGAAGT CGTCTCCAC GAAGTCCGG GAGAACCCGA
901 GCCGTCGGT CCAGAACTCG ACCGCTCCGG CGACGTCGCG CGCGGTGAGC ACCGGAACGG
961 CGCTGGTCAG CTTGGCCATC GAGCTCGGTA CCCGGGGATC CATGATTGTT GTATTATGTA
1021 CCTATGTTTG TGATGAGACA ATAAATATGA GAAGAGAACG TTGCGGCCAC TTTTTTCTCC
1081 TTCCTTCGCG TGCTCATGTT GGTGGTTTGG GAGGCGAAG ATGCATGGAG CGCCACACAT
1141 TCGGTAGGAC GAAACAGCCT CCCCACAAA GGGACCATGG GTAGTAGGA TGACGCACAA
1201 GCCAGTTCCC GCTCTGAAG GGAACCCAG GCATTTCTT CCTCTTTTCA AGCCACTTGT
1261 TCACGTGTCA ACACAATTTT GGAATAAAAT GCCCCTCGGA ACTCGGCAGG CCTCCCTCTG
1321 CTCCGTTGTC CTGGTCGCCG AGAACGCGAG ACCGTGCCGC ATGCCATCGA TCTGCTCGTC
1381 TGTACTACTA ATCGTGTGCG TGTTCTGTCT TGTTCGCAC GAAATTGTCC TCGTTCGGCC

```

1441 CTCACAACGG TGGAAATCGG TGCTAGAATA AAGTGAGGTG GCTTATTTCA ATGGCGGCCG  
1501 TCATCATGCG GGATCAACTG AAGTACGGCG GGTTCTCGAG ATTTTCATCGT GCTCGTCCAG  
1561 AGCAGGTGTT TTGCCCTGCAG CTCTTCATGT TTAGGGGTCA TGATTTTCATC TGATATGCCG  
1621 TAAGAAAACC AATATTCACT TCTCAATTTT CCATGGAAAG GTGAAGGCCT AGGTTGTGTG  
1681 CGAGGCAACG ACTGGGGAGG GATCGCAACA TTCTTGCTAA CCTCCCCTCT ATCTTGCCG  
1741 CTGTGAATCG GCATATTTAC CGGGCTGAAT TGAGAAAAGT TTTTGAGGGA ATTTAAAAGT  
1801 GGCTGTCTTG CAAGCTTGGC TTCAGTGCCT GCTTAATTCT AACCGATCCA GCTTGTGATG  
1861 AGGCCCTTCT AAGCCTGGTA GTCAGAAGCG ACATGGCGCT ATAAATTTCT TCTCAGTTGG  
1921 AGAGTAGAAA AGCATGATTC GAACACGGTT TTCAACTGCC AAAGATATCT CCATTGTTTC  
1981 CTTCAATCTG TACACCTGCA CGGGCCAGTG AGGCCAGGAA ATAAAGATGG ACAGACGGCA  
2041 TGCTAGTAGA CTTTGTGAG ATTAGTGTTT GTGTTCTGCT TTATGGCTTT GAGTGGCCCC  
2101 CCTTAACCTA TACACACATG ACAATCAGGT GACGAGGAA GCTCTCGACT TCCAGGTCTC  
2161 CAACACATCA TGAGGACGCC GCTCTGCCAG GACCCCTCCC GACTCCTTCC CACCCTTATT  
2221 CTTACCCGGC ATCTGCATCC GGGGTCTTGA AGGCGTGCTG GACTCCACG ATGCCACGT  
2281 CGGTGTTGCT GTGATCCTCC TCCACGCGGC GGAAGGCGAA CATGGGGCCC CCGTTCGCA  
2341 GGATGCTGGG GTGGATGGCG CTCTTGAAAG GCATGTGGCT GTCCACCACG GAGCTGTAGT  
2401 AGCCGCCGTC GCGCAGGCTG AAGGTGCGGG TGAAGCTGCC ATCCAGATCG TTATCGCCCA  
2461 TGGGGTGCAG GTGCTCCACG GTGGCGTTGC TGGCGATGAT CTTGTCGGTG AAGATCACGC  
2521 TGCTCTCGGG GAAGCCGGTG CCCATCACCT TGAAGTCGCC GATCACGCGG CCGGCCCTCGT  
2581 AGCGGTAGCT GAAGCTCACG TGCAGCACGC CGCCGTCTC GTACTTCTCG ATGCGGGTGT  
2641 TGGTGTAGCC GCCGTTGTTG ATGGCGTGCA GGAAGGGGTT CTCGTAGCCG CTGGGGTAGG  
2701 TGCCGAAGTG GTAGAAGCCG TAGCCCATCA CGTGGCTCAG CAGGTAGGGG CTGAAGGTCA  
2761 GGGCGCCTTT GGTGCTCTTC ATCTTGTGG TCATGCGGGG CTGCTCGGGG GTGCCCTCTC  
2821 CGCCGCCCAC CAGCTCGAAC TCCACGCCGT TCAGGGTGCC GGTGATGCGG CACTCGATCT  
2881 CCATGGCGGG CAGGCCGCTC TCGTCGCTCT CCAACATGTA AGCTAGGCTT TTGGTGAGAG  
2941 AATGGGAAAG AAGTTAGATG TAAAATTGAA CTTCCGTTGT CGAATTTAG AGGTAGTGCG  
3001 CGGTGCGTGC GCAACGAAG ACCGTCTGCG ACAGTCGGAG AGAATTGGGG TAGCCACTAG  
3061 AGTAGAAAAC CTTCACTTTC CCGCCTGAGC ACCGTTTCTG GAAAGGATCT GAAGATTGAG  
3121 ATATGATTTT TCGAACTTGC ACCGATGTGG CCCTCGTGTA GAAGACGAGG CAGAGTGGAT  
3181 ATAGTGCCAC TGAAGACATG CAGCAAGCTA CCGAACACG CGATAATGGA GACTAGCGCG  
3241 TCTGCCATTG GCAACCGTGC TCGCCTTCTC GTGATCTTAC GTGTCGCGTC TCTTCATCTC  
3301 CGTACACGAA AAATATTGGT ATGCGCGTGC ATTATGCTTT CAGTACGTGT AAATGAGAGA  
3361 CAGGCAATGC CACACTACTG GCGCAGGACA TGTTATCCTC ATCCGGGTCG CTTTTCTTGC  
3421 TCTATGCAAG GAAAGGGGCG GAAATGATAG AGATTGATAA ATTGATCGAC GCGGAAGAGT  
3481 TATTACTCTG CATGACAATG AAGTGTGCTT TTAAGTTTT GTTTATCGAG AGGCCTCGTG  
3541 CGAGAAATTT TTGTGCGAGC ATGATTGACT TGTAGGATAG ATACTAGCTG GACTGTCTT  
3601 CGACATCCCT ACACCTCTG CCAAACGGAA AAAAAAGCA TCTGTCGGCT GCACACAGAT  
3661 TGCGACTACT TATAACTTCA AACTATGCTA TAAGTGTCTT TTTCTTTCTT TCTTTTCTT  
3721 CCTTGCCGTC CTTTATGCCA TAACCTCGTA TAGGATACTT TATACGAAGT TATCCTGCAG  
3781 GCAGTTGGTA CGGCATATTA TGGTTTAAAC ATCTATCCTC CAGATCACCA GGGCGCGCCT  
3841 ATGCTTGTA ACCGTTTTGT GAAAAAATTT TAAAATAAA AAAGGGGACC TCTAGGGTCC  
3901 CCAATTAATT AGTAATATAA TCTATTAAG GTCATTCAA AGGTCATCCA GACGAAAGGG  
3961 CCTCGTGATA CGCCTATTTT TATAGTTAA TGTCATGATA ATAATGGTTT CTTAGACGTC  
4021 AGGTGGCAC

//
